# Supplementary material for: Silver-catalyzed C2-selective direct alkylation of heteroarenes with tertiary cycloalkanols
Source: Royal Society of Chemistry journal article supplement (doi:10.1039/c6ob02330d), 2016-11-22
Supplement: c6ob02330d1.pdf [file c6ob02330d1.pdf]

# Silver-Catalyzed C2-Selective Direct Alkylation of Heteroarenes with Tertiary Cycloalkanols

Shi-Chao Lu,<sup>a</sup> Hong-Shuang Li,<sup>\*b</sup> Shu Xu,<sup>a</sup> and Gui-Yun Duan<sup>b</sup>

<sup>a</sup>State Key Laboratory of Bioactive Substance and Function of Natural Medicines, and Beijing Key Laboratory of Active Substance Discovery and Drugability Evaluation, Institute of Materia Medica, Peking Union Medical College and Chinese Academy of Medical Sciences, No. 1 Xiannongtan Street, Beijing 100050, P R China;  
Email: lushichao@imm.ac.cn

<sup>b</sup>School of Pharmaceutical Sciences, Taishan Medical University, 619 Changcheng Road, Taian 271016, P R China; Email: lihongshuang8625@163.com

## Supplementary Data

| <b>Table of Contents</b>                                                      | <b>Page</b> |
|-------------------------------------------------------------------------------|-------------|
| 1. General Information                                                        | S2          |
| 2. Starting Materials                                                         | S3          |
| 3. General Procedure for the Preparation of the Target Compounds              | S3          |
| 4. Analytical Data of the Target Compounds                                    | S4          |
| 5. References                                                                 | S13         |
| 6. <sup>1</sup> H NMR and <sup>13</sup> C NMR Spectra of the Target Compounds | S14         |

## 1. General Information

All reagents were used as received from commercial source (Aladdin) unless specified otherwise. Anhydrous THF was purchased from J&K and used without any purification. Silver catalysts were purchased from Aladdin or Alfa-Aesar. All the cycloalcohols were prepared as described in the literature. Melting points were determined on an X-4 binocular microscope and were uncorrected.  $^1\text{H}$  NMR and  $^{13}\text{C}$  NMR spectra were recorded on a Bruker Advance 400 spectrometer at the ambient temperature in  $\text{CDCl}_3$ . Data for  $^1\text{H}$  NMR are reported as follows: chemical shift ( $\delta$  ppm), multiplicity, integration, and coupling constant (Hz). Data for  $^{13}\text{C}$  NMR are reported in terms of chemical shift ( $\delta$  ppm). The following abbreviations were used to describe peak splitting patterns when appropriate: s = singlet, d = doublet, t = triplet, m = multiplet. High-resolution mass spectra (HRMS) was carried out by LC/MSD TOF using a column of C18 (rapid resolution,  $3.5\ \mu\text{m}$ ,  $2.1\ \text{mm} \times 30\ \text{mm}$ ) at a flow of  $0.40\ \text{mL/min}$ . Column chromatography was performed using 200-300 mesh silica gel. Organic solutions were concentrated under reduced pressure on a BUCHI rotary evaporator.

## 2. Starting Materials

Tertiary cyclopropanols were prepared by the addition of Grignard reagent to the precursor according to the reported procedure.<sup>1</sup> Tertiary cyclobutanols and cyclopentanols were prepared by the addition of Grignard reagent to the corresponding cycloketones according to the reported procedure.<sup>2</sup>

## 3. General Procedure for the Preparation of the Target Compounds

To a solution of the substrate (0.2 mmol) and cycloalcohol (0.4 mmol) in 0.5 mL of 1,2-dichloroethane (DCE) and 0.5 mL of H<sub>2</sub>O was successively added K<sub>2</sub>S<sub>2</sub>O<sub>8</sub> (0.8 mmol), AgBF<sub>4</sub> (0.04 mmol) at room temperature. The resulting heterogeneous mixture was charged three times with aron, and then stirred for 12 h. After completion of the reaction, the mixture was added 10 mL of H<sub>2</sub>O, and then extracted with ethyl acetate (10 mL × 3). The combined organic phases were dried over anhydrous Na<sub>2</sub>SO<sub>4</sub> and concentrated under reduced pressure. The residue was purified by silica gel column chromatography (petroleum ether/ethyl acetate) to afford the target compound.

## 4. Analytical Data of the Target Compounds

### 3-(Benzo[d]thiazol-2-yl)-1-phenylpropan-1-one (3a)

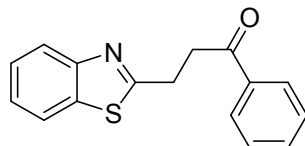

Colorless oil, 40.6 mg (76%);  $^1\text{H}$  NMR (400MHz,  $\text{CDCl}_3$ )  $\delta$  8.01-8.03 (m, 2H), 7.95 (d,  $J = 8.0$  Hz, 1H), 7.83 (d,  $J = 8.0$  Hz, 1H), 7.56-7.60 (m, 1H), 7.42-7.49 (m, 3H), 7.33-7.36 (m, 1H), 3.66 (t,  $J = 6.8$  Hz, 2H), 3.57 (t,  $J = 6.8$  Hz, 2H);  $^{13}\text{C}$  NMR (100MHz,  $\text{CDCl}_3$ )  $\delta$  198.0, 170.6, 153.2, 136.6, 135.3, 133.4, 128.8, 128.2, 126.0, 124.9, 122.6, 121.6, 37.5, 28.3; HRMS (ESI): Exact mass calcd for  $\text{C}_{16}\text{H}_{14}\text{NOS}$   $[\text{M}+\text{H}]^+$  268.0796, found 268.0786.

### 3-(Benzo[d]thiazol-2-yl)-1-p-tolylpropan-1-one (3b)

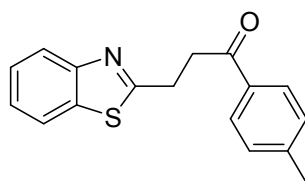

Colorless oil, 40.5 mg (72%);  $^1\text{H}$  NMR (400MHz,  $\text{CDCl}_3$ )  $\delta$  7.95 (ddd,  $J = 8.0$  Hz, 1.2 Hz, 0.4 Hz, 1H), 7.92 (d,  $J = 8.4$  Hz, 2H), 7.83 (ddd,  $J = 8.0$  Hz, 1.2 Hz, 0.4 Hz, 1H), 7.42-7.46 (m, 1H), 7.33-7.37 (m, 1H), 7.27 (d,  $J = 7.6$  Hz, 2H), 3.61-3.65 (m, 2H), 3.54-3.58 (m, 2H), 2.42 (s, 3H);  $^{13}\text{C}$  NMR (100MHz,  $\text{CDCl}_3$ )  $\delta$  197.6, 170.8, 153.3, 144.3, 135.4, 134.1, 129.4, 128.3, 126.0, 124.9, 122.6, 121.6, 37.5, 28.4, 21.8; HRMS (ESI): Exact mass calcd for  $\text{C}_{17}\text{H}_{16}\text{NOS}$   $[\text{M}+\text{H}]^+$  282.0953, found 282.0943.

### 3-(Benzo[d]thiazol-2-yl)-1-biphenylpropan-1-one (3c)

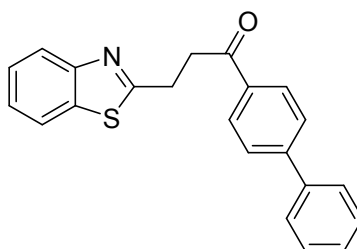

Colorless oil, 46.0 mg (67%);  $^1\text{H}$  NMR (400MHz,  $\text{CDCl}_3$ )  $\delta$  8.10 (d,  $J = 8.8$  Hz, 2H), 7.96 (d,  $J = 8.0$  Hz, 1H), 7.84 (d,  $J = 8.0$  Hz, 1H), 7.70 (d,  $J = 8.8$  Hz, 2H), 7.62-7.64 (m, 2H), 7.33-7.50 (m, 5H), 3.69 (t,  $J = 6.8$  Hz, 2H), 3.60 (t,  $J = 6.4$  Hz, 2H);  $^{13}\text{C}$  NMR (100MHz,  $\text{CDCl}_3$ )  $\delta$  197.6, 170.6, 153.2, 146.1, 139.9, 135.34, 135.27, 129.1, 128.8, 128.4, 127.39, 127.36, 126.0, 124.9, 122.6, 121.6, 37.6, 28.4; HRMS (ESI): Exact mass calcd for  $\text{C}_{22}\text{H}_{18}\text{NOS}$   $[\text{M}+\text{H}]^+$  344.1109, found 344.1096.

### 3-(Benzo[d]thiazol-2-yl)-1-(4-bromophenyl)propan-1-one (3d)

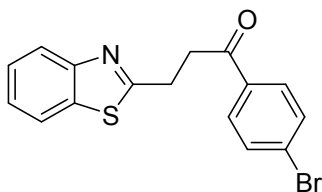

Colorless oil, 44.3 mg (64%);  $^1\text{H}$  NMR (400MHz,  $\text{CDCl}_3$ )  $\delta$  7.95 (d,  $J = 8.4$  Hz, 1H), 7.88 (d,  $J = 8.8$  Hz, 2H), 7.83 (d,  $J = 8.0$  Hz, 1H), 7.61 (d,  $J = 8.4$  Hz, 2H), 7.42-7.47 (m, 1H), 7.33-7.37 (m, 1H), 3.61-3.65 (m, 2H), 3.54-3.58 (m, 2H);  $^{13}\text{C}$  NMR (100MHz,  $\text{CDCl}_3$ )  $\delta$  197.0, 170.4, 153.1, 135.29, 135.25, 132.1, 131.9, 131.7, 129.7, 128.6, 126.1, 125.0, 122.6, 121.6, 37.4, 28.1; HRMS (ESI): Exact mass calcd for  $\text{C}_{16}\text{H}_{13}\text{BrNOS}$   $[\text{M}+\text{H}]^+$  345.9901, found 345.9892.

### 3-(Benzo[d]thiazol-2-yl)-1-(4-methoxyphenyl)propan-1-one (3e)

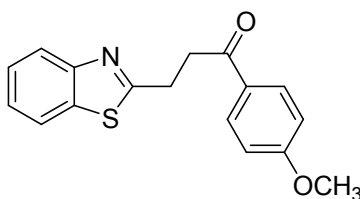

Colorless oil, 39.8 mg (67%);  $^1\text{H}$  NMR (400MHz,  $\text{CDCl}_3$ )  $\delta$  8.00 (d,  $J = 8.8$  Hz, 2H), 7.95 (ddd,  $J = 8.4$  Hz, 1.2 Hz, 0.8 Hz, 1H), 7.83 (ddd,  $J = 8.0$  Hz, 1.2 Hz, 0.8 Hz, 1H), 7.42-7.46 (m, 1H), 7.33-7.37 (m, 1H), 6.94 (d,  $J = 8.8$  Hz, 2H), 3.87 (s, 3H), 3.54-3.63 (m, 4H);  $^{13}\text{C}$  NMR (100MHz,  $\text{CDCl}_3$ )  $\delta$  196.5, 170.8, 163.8, 153.3, 135.4, 130.5, 129.7, 126.0, 124.9, 122.6, 121.6, 113.9, 55.6, 37.2, 28.5; HRMS (ESI): Exact mass calcd for  $\text{C}_{17}\text{H}_{16}\text{NO}_2\text{S}$   $[\text{M}+\text{H}]^+$  298.0902, found 298.0892.

### 3-(Benzo[d]thiazol-2-yl)-1-(4-fluorophenyl)propan-1-one (3f)

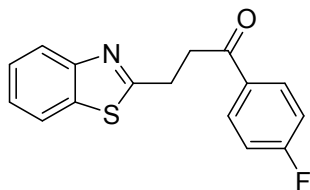

Colorless oil, 33.1 mg (58%);  $^1\text{H}$  NMR (400MHz,  $\text{CDCl}_3$ )  $\delta$  8.03-8.06 (m, 2H), 7.94 (d,  $J = 8.0$  Hz, 1H), 7.83 (d,  $J = 8.0$  Hz, 1H), 7.42-7.47 (m, 1H), 7.33-7.37 (m, 1H), 7.14 (t,  $J = 8.8$  Hz, 2H), 3.62-3.66 (m, 2H), 3.54-3.58 (m, 2H);  $^{13}\text{C}$  NMR (100MHz,  $\text{CDCl}_3$ )  $\delta$  196.4, 170.4, 166.0 (d,  $J = 253.5$  Hz), 153.2, 135.3, 133.0 (d,  $J = 3.0$  Hz), 130.9 (d,  $J = 9.2$  Hz), 126.0, 124.9, 122.6, 121.6, 115.9 (d,  $J = 21.8$  Hz), 37.4, 28.2; HRMS (ESI): Exact mass calcd for  $\text{C}_{16}\text{H}_{13}\text{FNOS}$   $[\text{M}+\text{H}]^+$  286.0702, found 286.0692.

### 3-(Benzo[d]thiazol-2-yl)-1-(4-(trifluoromethyl)phenyl)propan-1-one (3g)

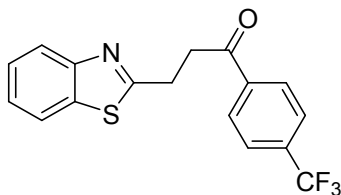

Colorless oil, 31.5 mg (47%);  $^1\text{H}$  NMR (400MHz,  $\text{CDCl}_3$ )  $\delta$  8.13 (d,  $J = 8.0$  Hz, 2H), 7.94 (ddd,  $J = 8.0$  Hz, 1.2 Hz, 0.4 Hz, 1H), 7.84 (ddd,  $J = 8.0$  Hz, 1.2 Hz, 0.4 Hz, 1H), 7.75 (d,  $J = 8.0$  Hz, 2H), 7.43-7.47 (m, 1H), 7.34-7.38 (m, 1H), 3.57-3.61 (m, 2H), 3.67-3.71 (m, 2H);  $^{13}\text{C}$  NMR (100MHz,  $\text{CDCl}_3$ )  $\delta$  197.1, 170.0, 153.2, 139.3, 135.3, 134.7 (q,  $J = 32.6$  Hz), 128.6, 126.1, 125.9 (q,  $J = 3.7$  Hz), 125.0, 122.6, 123.6 (q,  $J = 270.8$  Hz), 121.6, 37.6, 28.1; HRMS (ESI): Exact mass calcd for  $\text{C}_{17}\text{H}_{13}\text{F}_3\text{NOS}$   $[\text{M}+\text{H}]^+$  336.0670, found 336.0662.

### 4-(Benzo[d]thiazol-2-yl)-1-(4-methoxyphenyl)butan-2-one (3h)

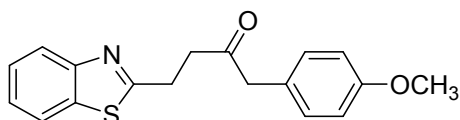

Colorless oil, 41.1 mg (66%);  $^1\text{H}$  NMR (400MHz,  $\text{CDCl}_3$ )  $\delta$  7.92 (d,  $J = 8.0$  Hz, 1H), 7.81 (ddd,  $J = 8.0$  Hz, 1.2 Hz, 0.4 Hz, 1H), 7.42-7.46 (m, 1H), 7.32-7.36 (m, 1H),

7.12 (d,  $J = 8.4$  Hz, 2H), 6.84 (d,  $J = 8.8$  Hz, 2H), 3.78 (s, 3H), 3.71 (s, 2H), 3.35 (t,  $J = 7.2$  Hz, 2H), 3.09 (t,  $J = 7.2$  Hz, 2H);  $^{13}\text{C}$  NMR (100MHz,  $\text{CDCl}_3$ )  $\delta$  206.7, 170.3, 158.8, 153.1, 135.3, 130.5, 126.0, 125.9, 124.9, 122.6, 121.6, 124.3, 55.3, 49.4, 40.3, 28.1; HRMS (ESI): Exact mass calcd for  $\text{C}_{18}\text{H}_{18}\text{NO}_2\text{S}$   $[\text{M}+\text{H}]^+$  312.1058, found 312.1046.

### 3-(6-Methoxybenzo[*d*]thiazol-2-yl)-1-phenylpropan-1-one (3i)

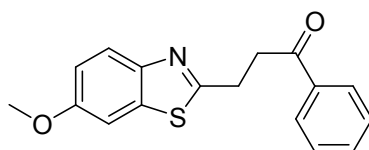

White solid, 48.8 mg (82%), mp 56–58 °C;  $^1\text{H}$  NMR (400MHz,  $\text{CDCl}_3$ )  $\delta$  8.01-8.04 (m, 2H), 7.82 (d,  $J = 9.2$  Hz, 1H), 7.57-7.60 (m, 1H), 7.45-7.50 (m, 2H), 7.29 (d,  $J = 2.4$  Hz, 1H), 7.04 (dd,  $J = 9.2$  Hz, 2.4 Hz, 1H), 3.86 (s, 3H), 3.62-3.66 (m, 2H), 3.50-3.54 (m, 2H);  $^{13}\text{C}$  NMR (100MHz,  $\text{CDCl}_3$ )  $\delta$  198.0, 167.9, 157.5, 147.8, 136.6, 133.4, 128.7, 128.2, 123.0, 116.2, 104.3, 55.9, 37.6, 28.2; HRMS (ESI): Exact mass calcd for  $\text{C}_{17}\text{H}_{16}\text{NO}_2\text{S}$   $[\text{M}+\text{H}]^+$  298.0902, found 298.0889.

### 3-(6-Nitrobenzo[*d*]thiazol-2-yl)-1-phenylpropan-1-one (3j)

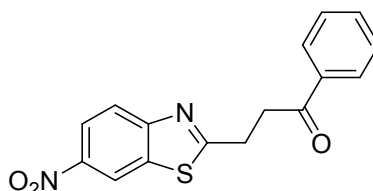

Yellow solid, 21.2 mg (34%), mp 111–113 °C;  $^1\text{H}$  NMR (400MHz,  $\text{CDCl}_3$ )  $\delta$  8.78 (d,  $J = 2.4$  Hz, 1H), 8.32 (dd,  $J = 8.8$  Hz, 2.4 Hz, 1H), 8.00-8.03 (m, 3H), 7.58-7.63 (m, 1H), 7.48-7.51 (m, 2H), 3.69-3.73 (m, 2H), 3.62-3.65 (m, 2H);  $^{13}\text{C}$  NMR (100MHz,  $\text{CDCl}_3$ )  $\delta$  197.5, 177.0, 157.0, 144.9, 136.4, 135.8, 133.6, 128.8, 128.2, 122.9, 121.6, 118.2, 37.0, 29.8; HRMS (ESI): Exact mass calcd for  $\text{C}_{16}\text{H}_{13}\text{N}_2\text{O}_3\text{S}$   $[\text{M}+\text{H}]^+$  313.0647, found 313.0634.

### 3-(Benzo[*d*]oxazol-2-yl)-1-phenylpropan-1-one (3k)

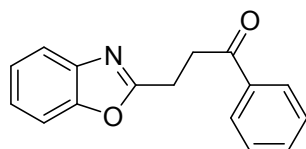

Colorless oil, 26.1 mg (52%);  $^1\text{H}$  NMR (400MHz,  $\text{CDCl}_3$ )  $\delta$  8.02-8.06 (m, 2H), 7.64-7.68 (m, 1H), 7.57-7.61 (m, 1H), 7.47-7.51 (m, 3H), 7.28-7.32 (m, 2H), 3.67 (t,  $J = 7.6$  Hz, 2H), 3.40 (t,  $J = 8.0$  Hz, 2H);  $^{13}\text{C}$  NMR (100MHz,  $\text{CDCl}_3$ )  $\delta$  197.6, 166.3, 150.9, 141.4, 136.5, 133.5, 128.8, 128.2, 124.7, 124.2, 119.6, 110.5, 35.1, 22.9; HRMS (ESI): Exact mass calcd for  $\text{C}_{16}\text{H}_{14}\text{NO}_2$   $[\text{M}+\text{H}]^+$  252.1025, found 252.1014.

### 1-Phenyl-3-(thiazol-2-yl)propan-1-one (3l)

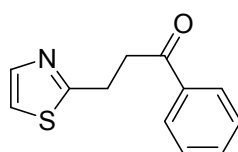

Colorless oil, 20.0 mg (46%);  $^1\text{H}$  NMR (400MHz,  $\text{CDCl}_3$ )  $\delta$  7.99-8.02 (m, 2H), 6.80 (d,  $J = 7.6$  Hz, 1H), 7.55-7.60 (m, 1H), 7.45-7.49 (m, 2H), 7.20 (d,  $J = 3.2$  Hz, 1H), 3.55-3.59 (m, 2H), 3.47-3.50 (m, 2H);  $^{13}\text{C}$  NMR (100MHz,  $\text{CDCl}_3$ )  $\delta$  198.2, 169.6, 142.3, 136.6, 133.4, 128.7, 128.2, 118.5, 37.9, 27.3; HRMS (ESI): Exact mass calcd for  $\text{C}_{12}\text{H}_{12}\text{NOS}$   $[\text{M}+\text{H}]^+$  218.0640, found 218.0631.

### 4-(Benzo[d]thiazol-2-yl)-1-phenylbutan-1-one (3m)

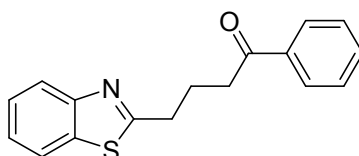

White solid, 38.3 mg (68%), mp 68–70 °C;  $^1\text{H}$  NMR (400MHz,  $\text{CDCl}_3$ )  $\delta$  7.94-7.98 (m, 3H), 7.85 (d,  $J = 8.0$  Hz, 1H), 7.55 (t,  $J = 7.6$  Hz, 1H), 7.43-7.48 (m, 3H), 7.34-7.38 (m, 1H), 3.25 (t,  $J = 7.2$  Hz, 2H), 3.14 (t,  $J = 7.2$  Hz, 2H), 2.32-2.39 (m, 2H);  $^{13}\text{C}$  NMR (100MHz,  $\text{CDCl}_3$ )  $\delta$  199.4, 171.4, 153.3, 136.9, 135.2, 133.2, 128.7, 128.1, 126.0, 124.9, 122.7, 121.6, 37.4, 33.5, 23.8; HRMS (ESI): Exact mass calcd for  $\text{C}_{17}\text{H}_{16}\text{NOS}$   $[\text{M}+\text{H}]^+$  282.0953, found 282.0942.

### 4-(Benzo[d]thiazol-2-yl)-1-(4-methoxyphenyl)butan-1-one (3n)



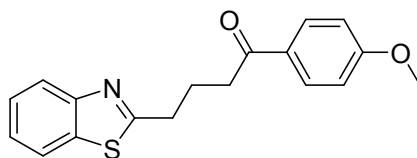

White solid, 43.6 mg (70%), mp 65–67 °C; <sup>1</sup>H NMR (400MHz, CDCl<sub>3</sub>) δ 7.97 (d, *J* = 8.0 Hz, 1H), 7.93 (d, *J* = 8.8 Hz, 2H), 7.84 (d, *J* = 8.0 Hz, 1H), 7.43-7.47 (m, 1H), 7.33-7.37 (m, 1H), 6.91 (d, *J* = 8.8 Hz, 2H), 3.86 (s, 3H), 3.24 (t, *J* = 7.2 Hz, 2H), 3.08 (t, *J* = 7.2 Hz, 2H), 2.30-2.37 (m, 2H); <sup>13</sup>C NMR (100MHz, CDCl<sub>3</sub>) δ 197.9, 171.5, 163.5, 153.2, 135.2, 130.4, 129.9, 126.0, 124.8, 122.6, 121.6, 113.8, 55.5, 37.1, 33.6, 24.0; HRMS (ESI): Exact mass calcd for C<sub>18</sub>H<sub>18</sub>NO<sub>2</sub>S [M+H]<sup>+</sup> 312.1058, found 312.1046.

#### 4-(Benzo[d]thiazol-2-yl)-1-(4-fluorophenyl)butan-1-one (3o)

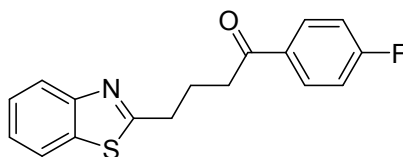

White solid, 37.1 mg (62%), mp 74–76 °C; <sup>1</sup>H NMR (400MHz, CDCl<sub>3</sub>) δ 7.96-8.00 (m, 3H), 7.84-7.86 (m, 1H), 7.44-7.49 (m, 1H), 7.34-7.38 (m, 1H), 7.09-7.15 (m, 2H), 3.25 (t, *J* = 7.2 Hz, 2H), 3.11 (t, *J* = 7.2 Hz, 2H), 2.31-2.39 (m, 2H); <sup>13</sup>C NMR (100MHz, CDCl<sub>3</sub>) δ 197.8, 171.2, 165.8 (d, *J* = 253.1 Hz), 153.3, 135.3, 133.3 (d, *J* = 3.0 Hz), 130.8 (d, *J* = 9.2 Hz), 126.1, 124.9, 122.7, 121.7, 115.8 (d, *J* = 21.7 Hz), 37.3, 33.5, 23.8; HRMS (ESI): Exact mass calcd for C<sub>17</sub>H<sub>15</sub>FNOS [M+H]<sup>+</sup> 300.0858, found 300.0848.

#### 5-(benzo[d]thiazol-2-yl)-1-phenylpentan-1-one (3p)

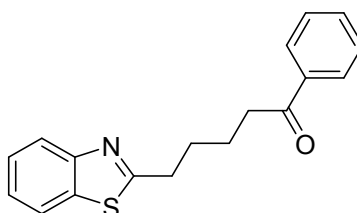

Colorless oil, 25.5 mg (43%); <sup>1</sup>H NMR (400MHz, CDCl<sub>3</sub>) δ 7.94-7.97 (m, 3H), 7.84 (dd, *J* = 8.0 Hz, 0.8 Hz, 1H), 7.53-7.58 (m, 1H), 7.43-7.47 (m, 3H), 7.33-7.37 (m, 1H),

3.19 (t,  $J = 7.2$  Hz, 2H), 3.06 (t,  $J = 7.2$  Hz, 2H), 1.87-2.04 (m, 4H);  $^{13}\text{C}$  NMR (100MHz,  $\text{CDCl}_3$ )  $\delta$  199.9, 171.8, 153.3, 137.0, 136.2, 133.1, 128.7, 128.1, 126.0, 124.8, 122.6, 121.6, 38.2, 34.2, 29.3, 23.7; HRMS (ESI): Exact mass calcd for  $\text{C}_{18}\text{H}_{18}\text{NOS}$   $[\text{M}+\text{H}]^+$  296.1109, found 296.1099.

### 1-Phenyl-3-(quinolin-2-yl)propan-1-one (5a)

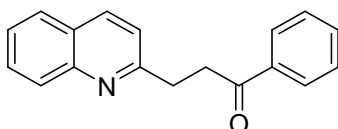

Colorless oil, 22.5 mg (43%);  $^1\text{H}$  NMR (400MHz,  $\text{CDCl}_3$ )  $\delta$  8.02-8.08 (m, 3H), 7.97 (d,  $J = 8.4$  Hz, 1H), 7.77 (dd,  $J = 8.0$  Hz, 1.2 Hz, 1H), 7.64-7.68 (m, 1H), 7.54-7.58 (m, 1H), 7.44-7.50 (m, 3H), 7.40 (d,  $J = 8.4$  Hz, 1H), 3.64 (t,  $J = 7.2$  Hz, 2H), 3.45 (t,  $J = 7.2$  Hz, 2H);  $^{13}\text{C}$  NMR (100MHz,  $\text{CDCl}_3$ )  $\delta$  199.5, 161.3, 147.9, 137.1, 136.4, 133.1, 129.4, 128.8, 128.6, 128.2, 127.6, 126.9, 125.9, 122.0, 37.6, 32.8; HRMS (ESI): Exact mass calcd for  $\text{C}_{18}\text{H}_{16}\text{NO}$   $[\text{M}+\text{H}]^+$  262.1232, found 262.1226.

### 3-(4-Chloroquinolin-2-yl)-1-phenylpropan-1-one (5b)

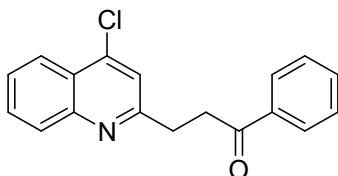

White solid, 40.2 mg (68%), mp 82–84 °C;  $^1\text{H}$  NMR (400MHz,  $\text{CDCl}_3$ )  $\delta$  8.17 (dd,  $J = 8.4$  Hz, 0.8 Hz, 1H), 8.02-8.04 (m, 2H), 7.96 (dd,  $J = 8.4$  Hz, 0.4 Hz, 1H), 7.68-7.72 (m, 1H), 7.54-7.58 (m, 2H), 7.51 (s, 1H), 7.45-7.48 (m, 2H), 3.63 (t,  $J = 7.2$  Hz, 2H), 3.41 (t,  $J = 7.2$  Hz, 2H);  $^{13}\text{C}$  NMR (100MHz,  $\text{CDCl}_3$ )  $\delta$  199.2, 161.2, 148.7, 142.6, 137.0, 133.1, 130.3, 129.2, 128.7, 128.2, 126.8, 125.1, 124.0, 122.0, 37.1, 32.5; HRMS (ESI): Exact mass calcd for  $\text{C}_{18}\text{H}_{15}\text{ClNO}$   $[\text{M}+\text{H}]^+$  296.0842, found 296.0835.

### 3-(4-Chloroquinolin-2-yl)-1-p-tolylpropan-1-one (5c)

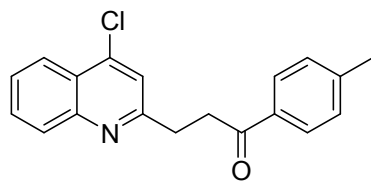

White solid, 52.7 mg (85%), mp 92–94 °C;  $^1\text{H}$  NMR (400MHz,  $\text{CDCl}_3$ )  $\delta$  8.18 (dd,  $J = 8.4$  Hz, 0.8 Hz, 1H), 7.97 (d,  $J = 7.6$  Hz, 1H), 7.92–7.94 (m, 2H), 7.68–7.73 (m, 1H), 7.55–7.59 (m, 1H), 7.51 (s, 1H), 7.26 (d,  $J = 8.0$  Hz, 2H), 3.60 (t,  $J = 7.2$  Hz, 2H), 3.40 (t,  $J = 7.2$  Hz, 2H), 2.41 (s, 3H);  $^{13}\text{C}$  NMR (100MHz,  $\text{CDCl}_3$ )  $\delta$  198.8, 161.4, 148.8, 143.9, 142.6, 134.6, 130.3, 129.3, 129.2, 128.3, 126.8, 125.1, 124.0, 122.0, 37.2, 32.6, 21.7; HRMS (ESI): Exact mass calcd for  $\text{C}_{19}\text{H}_{17}\text{ClNO}$   $[\text{M}+\text{H}]^+$  310.0999, found 310.0997.

### 3-(4-Chloro-6,7-dimethoxyquinolin-2-yl)-1-phenylpropan-1-one (5d)

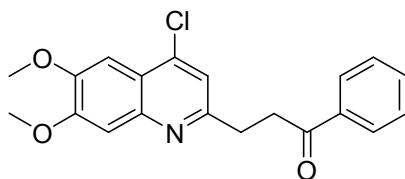

Colorless oil, 51.2 mg (72%);  $^1\text{H}$  NMR (400MHz,  $\text{CDCl}_3$ )  $\delta$  8.01–8.03 (m, 2H), 7.54–7.59 (m, 1H), 7.45–7.48 (m, 2H), 7.37 (s, 2H), 7.30 (s, 1H), 4.04 (s, 3H), 4.01 (s, 3H), 3.59 (t,  $J = 7.2$  Hz, 2H), 3.35 (t,  $J = 7.2$  Hz, 2H);  $^{13}\text{C}$  NMR (100MHz,  $\text{CDCl}_3$ )  $\delta$  199.1, 159.0, 153.0, 150.2, 146.8, 140.7, 137.1, 133.1, 128.6, 128.2, 130.4, 130.1, 107.9, 101.8, 56.3, 56.2, 37.7, 32.4; HRMS (ESI): Exact mass calcd for  $\text{C}_{20}\text{H}_{19}\text{ClNO}_3$   $[\text{M}+\text{H}]^+$  356.1053, found 356.1049.

### 3-(4-Chloro-6,7-dimethoxyquinolin-2-yl)-1-p-tolylpropan-1-one (5e)

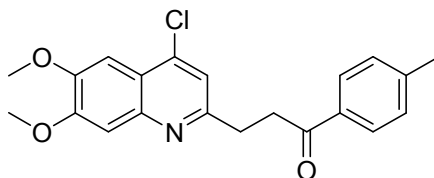

Colorless oil, 54.7 mg (74%);  $^1\text{H}$  NMR (400MHz,  $\text{CDCl}_3$ )  $\delta$  7.92 (d,  $J = 8.4$  Hz, 2H), 7.37 (s, 2H), 7.32 (s, 1H), 7.25 (d,  $J = 8.4$  Hz, 2H), 4.04 (s, 3H), 4.01 (s, 3H), 3.56 (t,  $J = 7.2$  Hz, 2H), 3.34 (t,  $J = 7.2$  Hz, 2H), 2.41 (s, 3H);  $^{13}\text{C}$  NMR (100MHz,  $\text{CDCl}_3$ )  $\delta$

198.7, 159.1, 153.1, 150.1, 145.7, 143.9, 140.7, 134.5, 129.3, 128.3, 130.4, 130.1, 107.9, 101.8, 56.3, 56.2, 37.7, 32.4, 21.7; HRMS (ESI): Exact mass calcd for  $C_{21}H_{21}ClNO_3$   $[M+H]^+$  370.1210, found 370.1205.

#### 4-(4-Chloroquinolin-2-yl)-1-phenylbutan-1-one (5f)

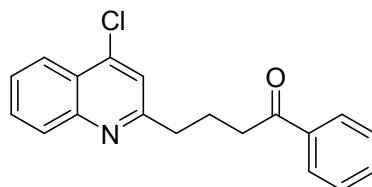

White solid, 43.4 mg (70%), mp 74–76 °C;  $^1H$  NMR (400MHz,  $CDCl_3$ )  $\delta$  8.19 (d,  $J$  = 8.4 Hz, 1H), 8.06 (d,  $J$  = 8.4 Hz, 1H), 7.94-7.96 (m, 2H), 7.72-7.76 (m, 1H), 7.53-7.61 (m, 2H), 7.43-7.46 (m, 3H), 3.10 (t,  $J$  = 7.2 Hz, 2H), 3.07 (t,  $J$  = 7.2 Hz, 2H), 2.27-2.34 (m, 2H);  $^{13}C$  NMR (100MHz,  $CDCl_3$ )  $\delta$  199.9, 162.0, 148.6, 143.0, 137.0, 133.1, 130.5, 129.1, 128.6, 128.1, 126.9, 125.1, 124.1, 121.5, 38.0, 37.8, 23.9; HRMS (ESI): Exact mass calcd for  $C_{19}H_{17}ClNO$   $[M+H]^+$  310.0999, found 310.0992.

#### 4-(4-Chloroquinolin-2-yl)-1-(4-methoxyphenyl)butan-1-one (5g)

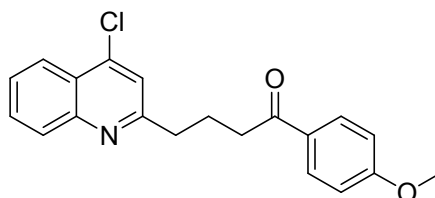

White solid, 53.7 mg (79%), mp 76–78 °C;  $^1H$  NMR (400MHz,  $CDCl_3$ )  $\delta$  8.19 (dd,  $J$  = 8.4 Hz, 0.8 Hz, 1H), 8.05 (d,  $J$  = 8.4 Hz, 1H), 7.92-7.96 (m, 2H), 7.72-7.76 (m, 1H), 7.57-7.61 (m, 1H), 7.47 (s, 1H), 6.90-6.94 (m, 2H), 3.86 (s, 3H), 3.06 (t,  $J$  = 7.2 Hz, 2H), 3.04 (t,  $J$  = 7.2 Hz, 2H), 2.25-2.32 (m, 2H);  $^{13}C$  NMR (100MHz,  $CDCl_3$ )  $\delta$  198.5, 163.5, 162.1, 148.7, 142.8, 130.4, 130.1, 129.2, 126.9, 125.1, 124.1, 121.6, 113.8, 55.5, 38.2, 37.5, 24.2; HRMS (ESI): Exact mass calcd for  $C_{20}H_{19}ClNO_2$   $[M+H]^+$  340.1104, found 340.1097.

## 5. References

- (1) (a) Ilangovan, A.; Saravanakumar, S.; Malayappasamy, S. *Org. Lett.* 2013, 15, 4968. (b) Jiao, J.; Nguyen, L. X.; Patterson, D. R.; Flowers II, R. A. *Org. Lett.* 2007, 9, 1323.
- (2) (a) Casey, B. M.; Eakin, C. A.; Flowers II, R. A. *Tetrahedron Lett.* 2009, 50, 1264. (b) Xu, H.-J.; Zhu, F.-F.; Shen, Y.-Y.; Wan, X.; Feng, Y.-S. *Tetrahedron* 2012, 68, 4145.

## 6. $^1\text{H}$ NMR and $^{13}\text{C}$ NMR Spectra of the Target Compounds

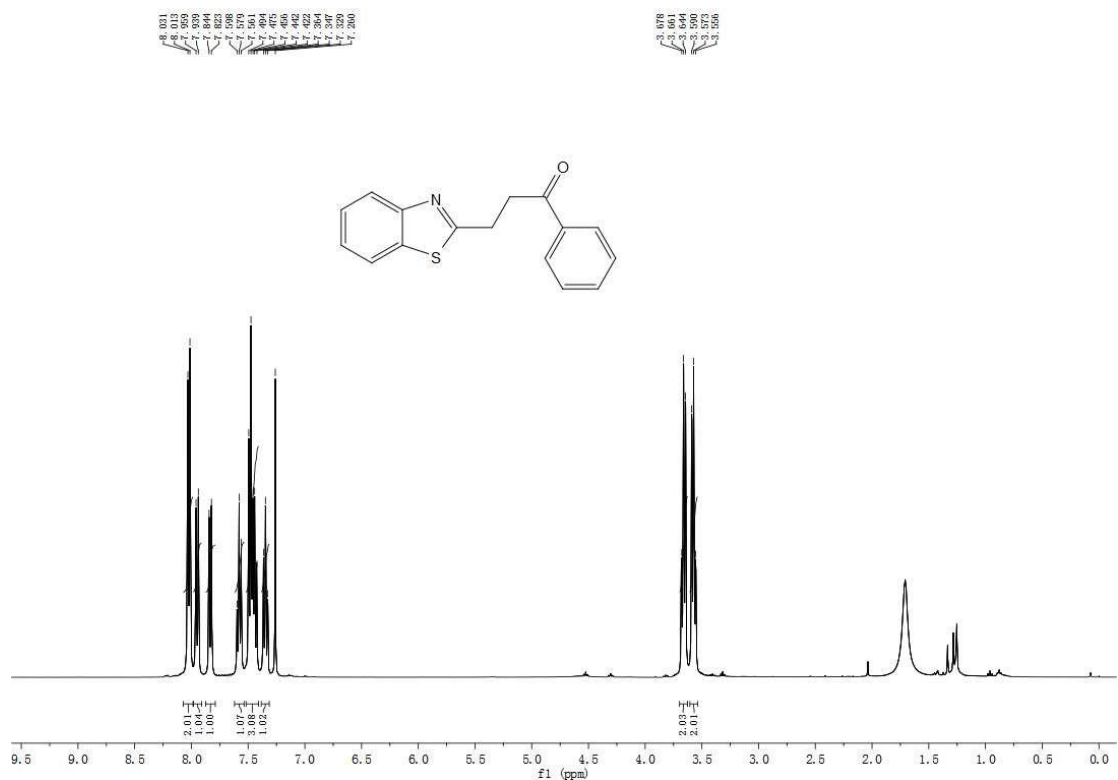

$^1\text{H}$  NMR spectrum of 3a

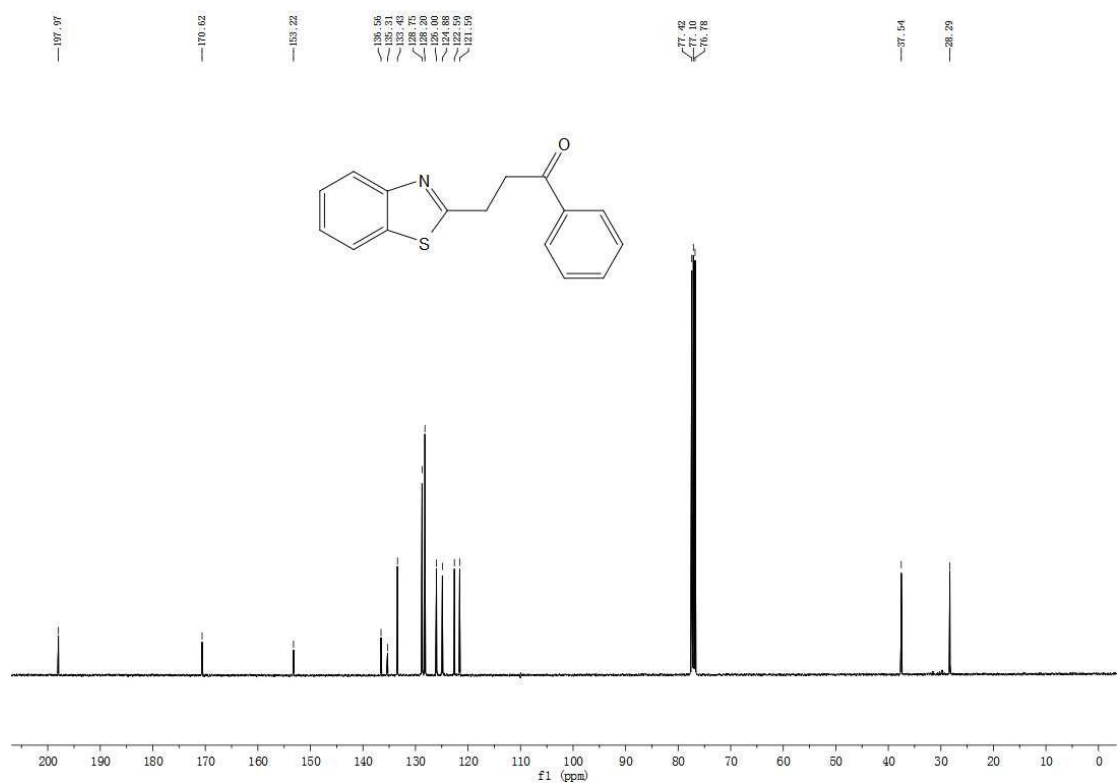

$^{13}\text{C}$  NMR spectrum of 3a

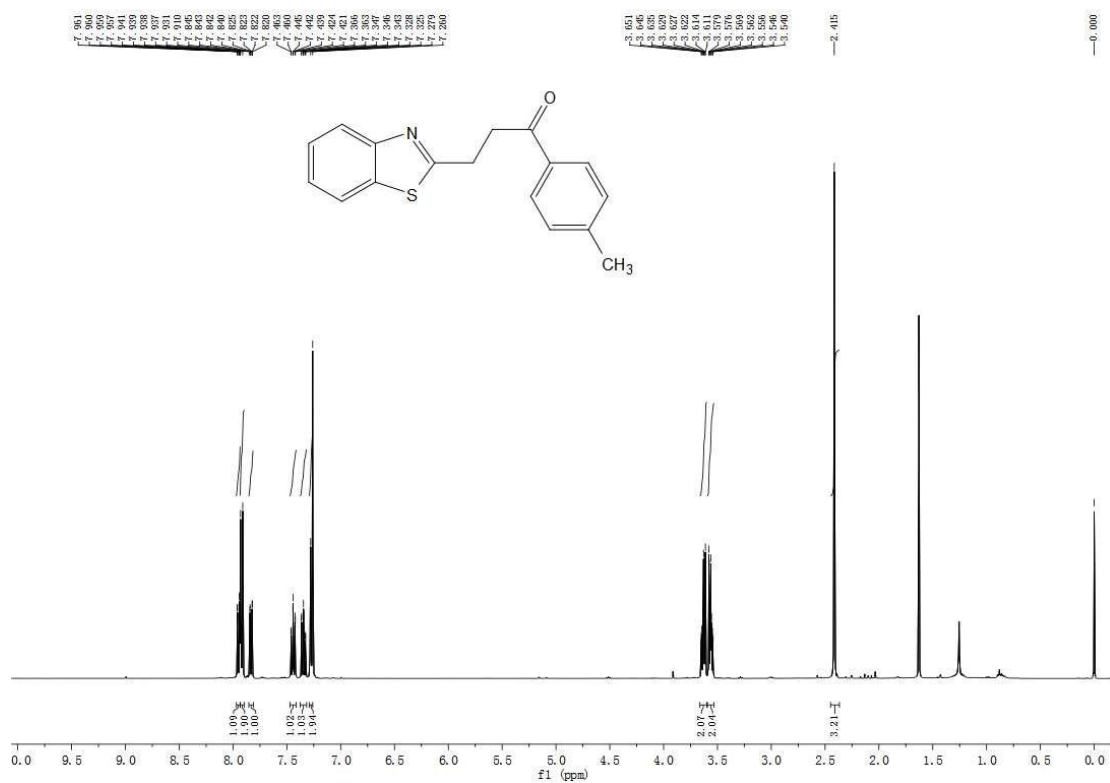

<sup>1</sup>H NMR spectrum of 3b

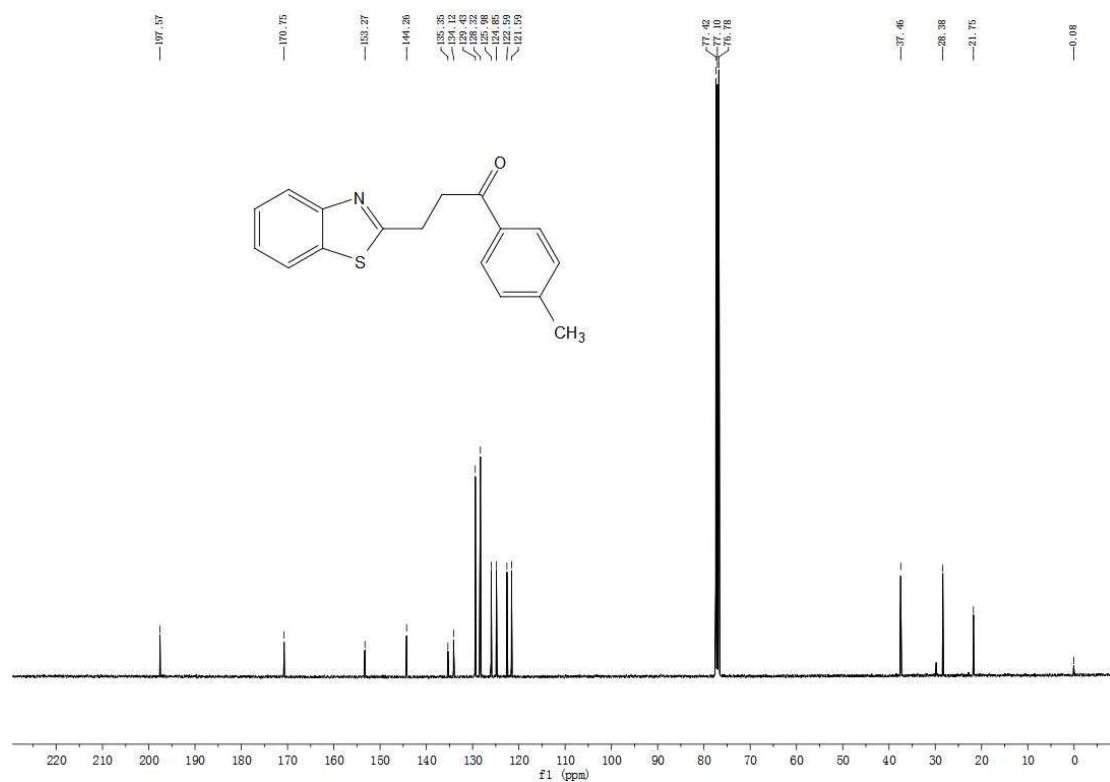

<sup>13</sup>C NMR spectrum of 3b

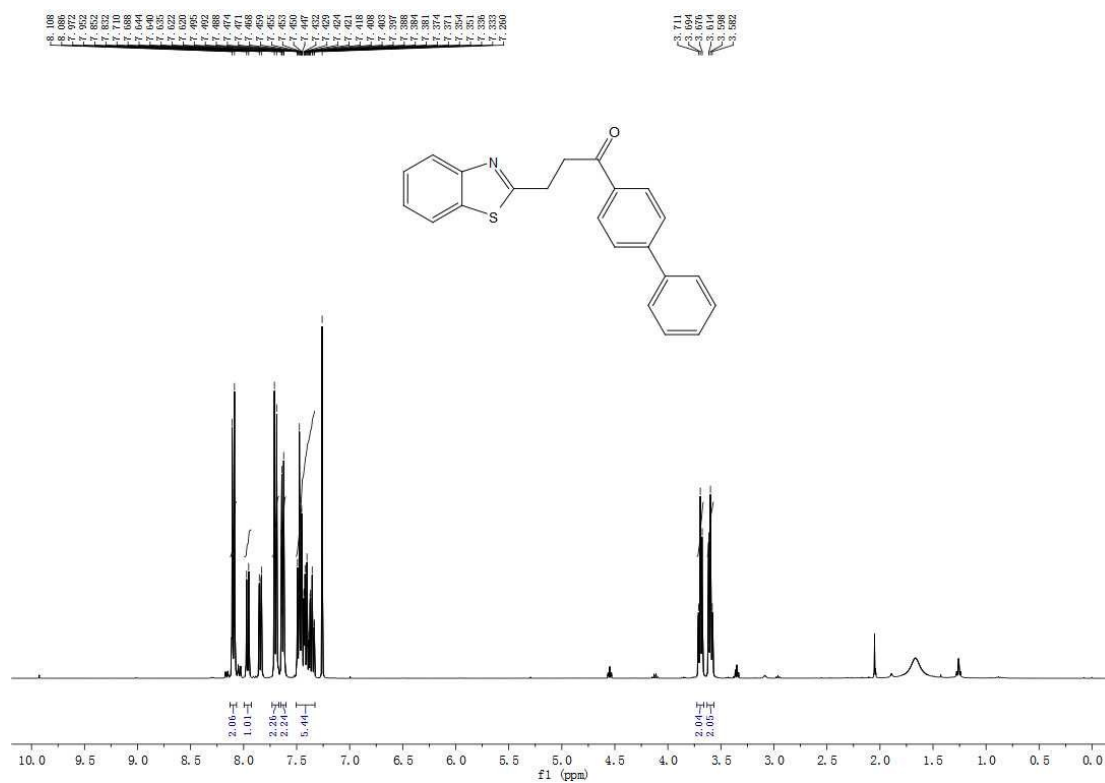

**<sup>1</sup>H NMR spectrum of 3c**

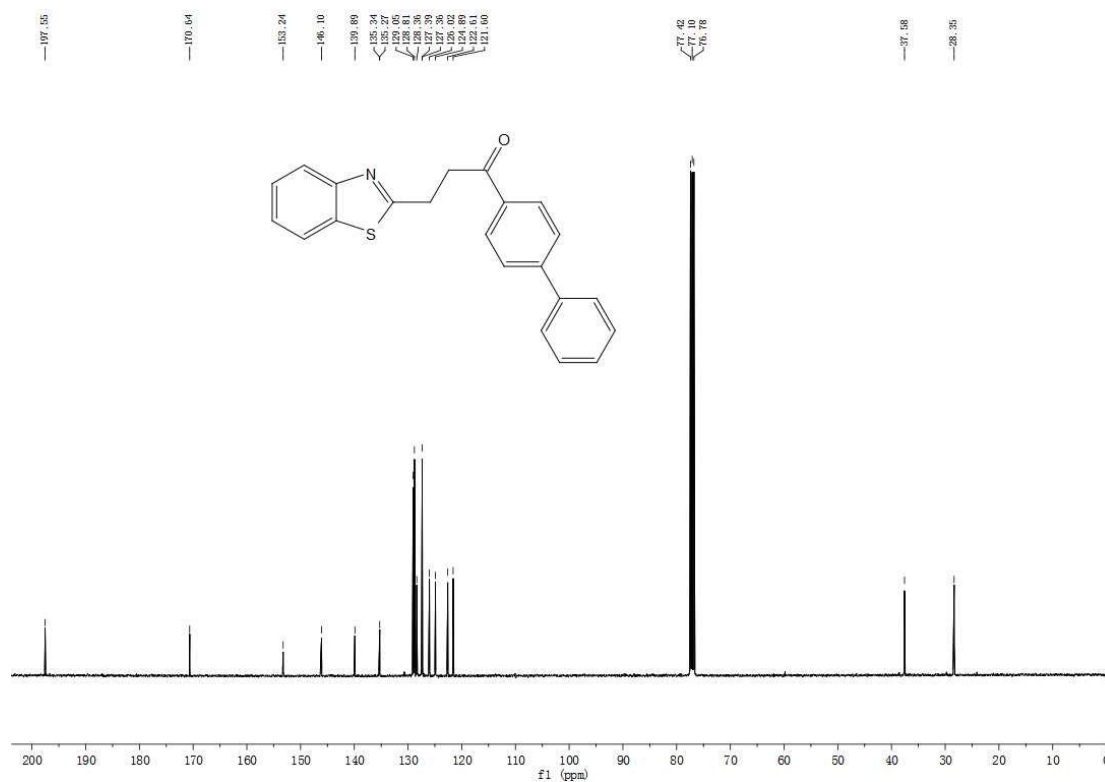

**<sup>13</sup>C NMR spectrum of 3c**



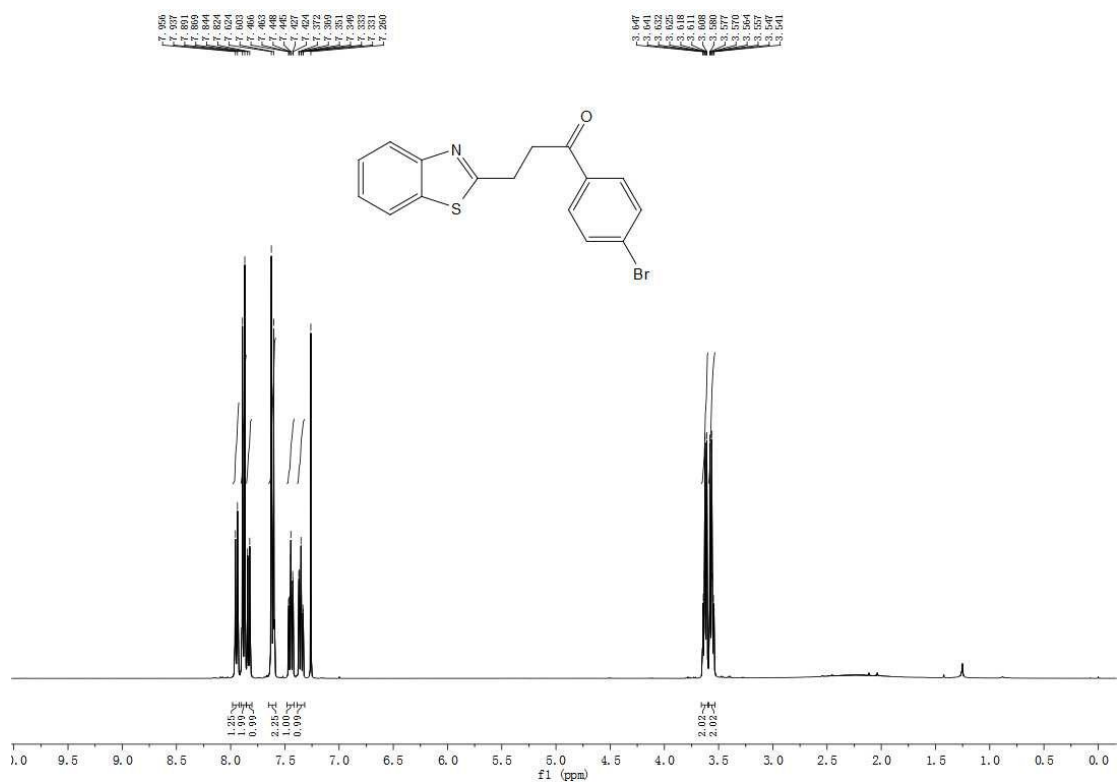

<sup>1</sup>H NMR spectrum of 3d

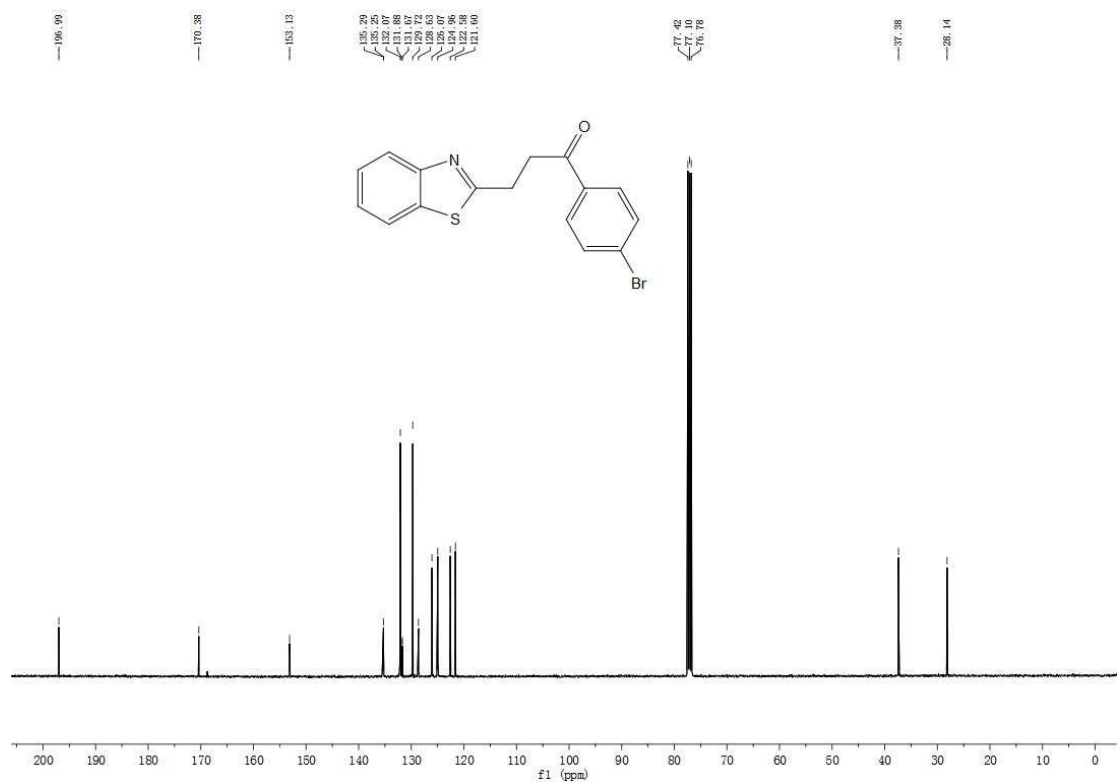

<sup>13</sup>C NMR spectrum of 3d

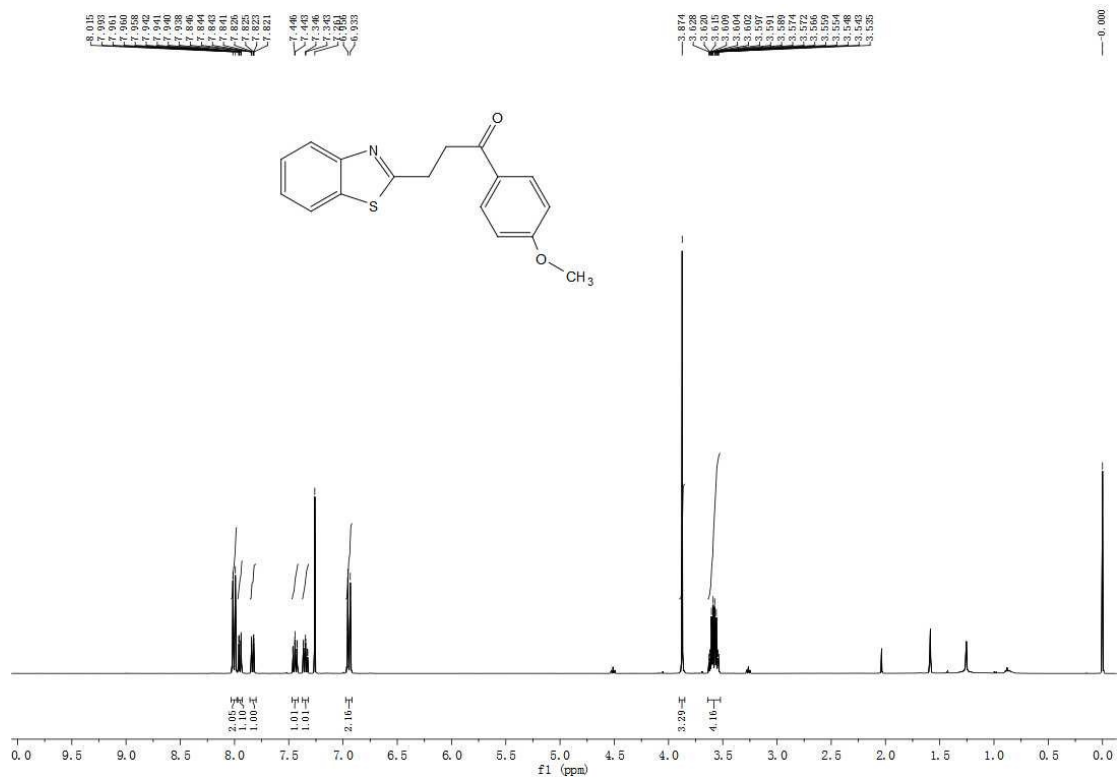

<sup>1</sup>H NMR spectrum of 3e

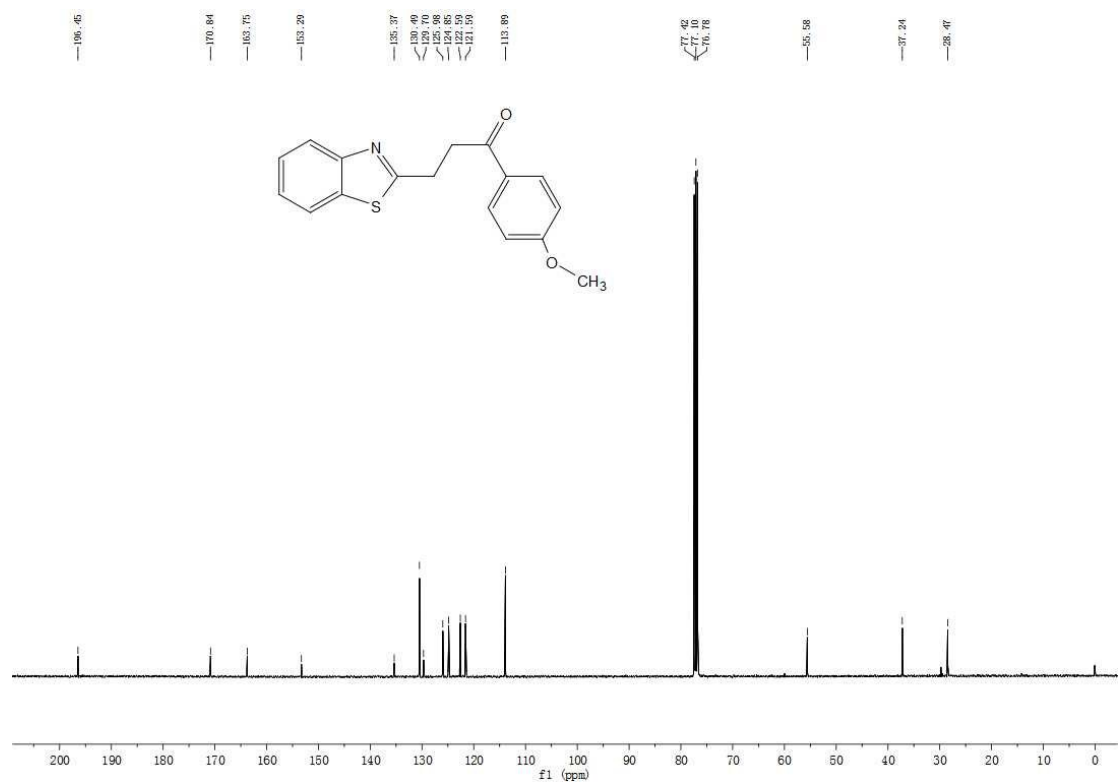

<sup>13</sup>C NMR spectrum of 3e

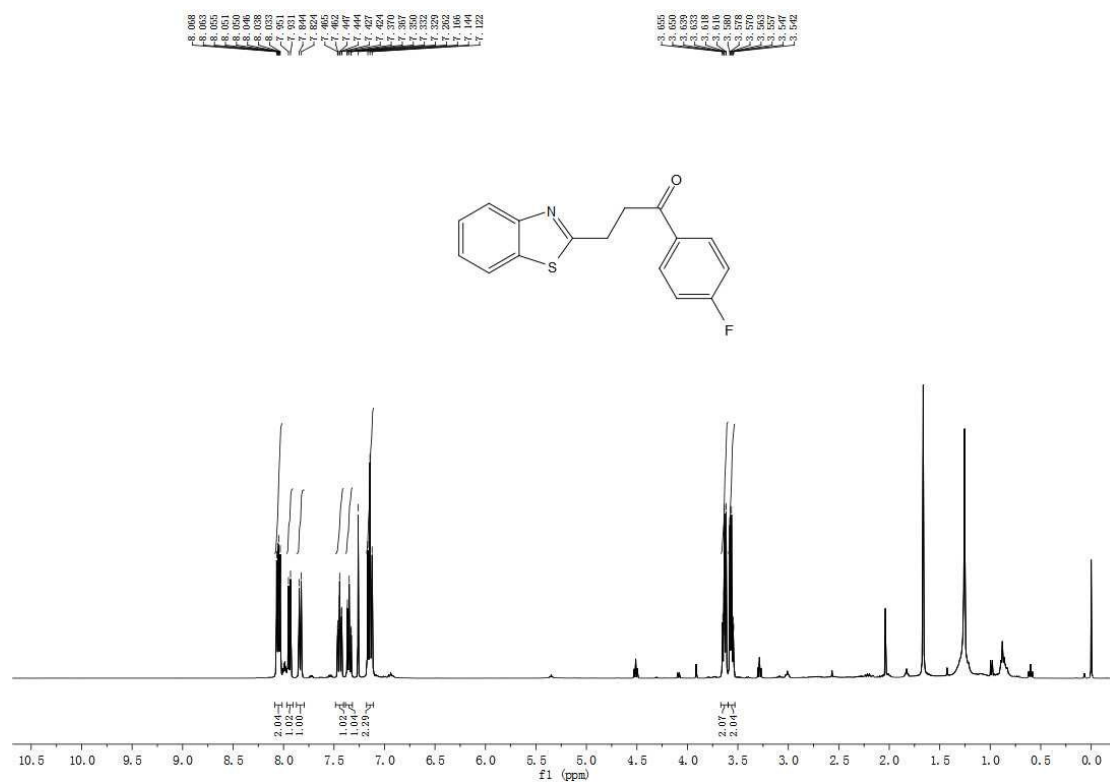

**<sup>1</sup>H NMR spectrum of 3f**

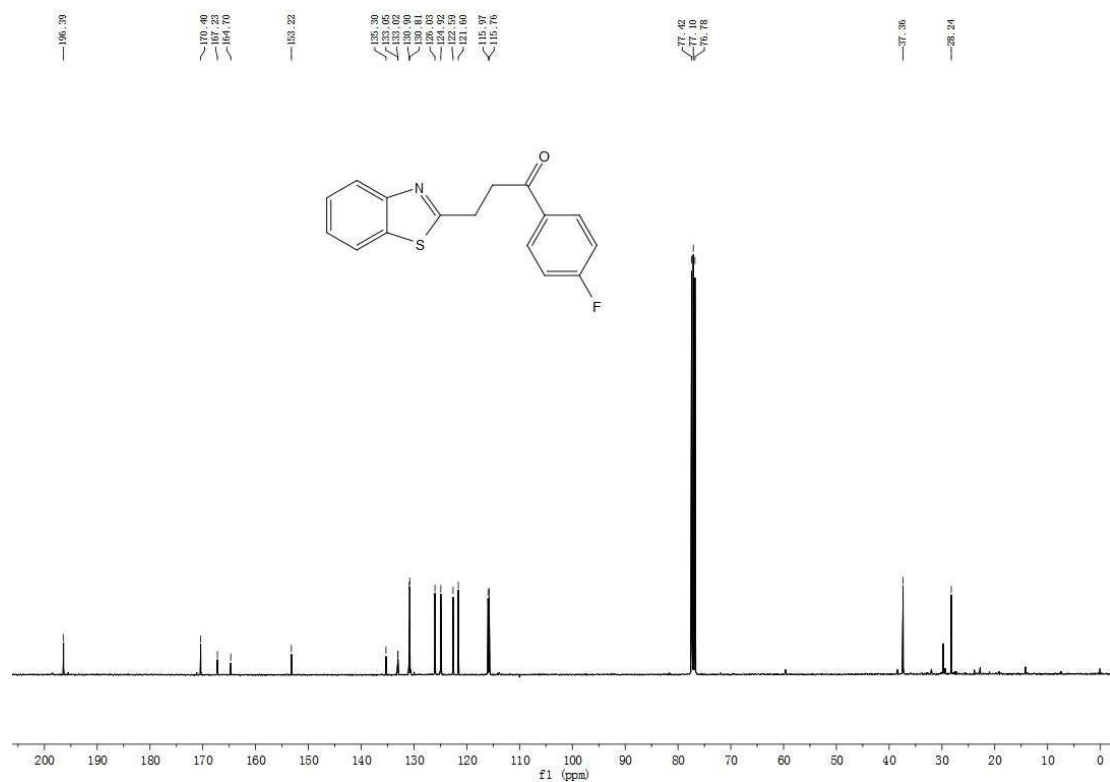

**<sup>13</sup>C NMR spectrum of 3f**

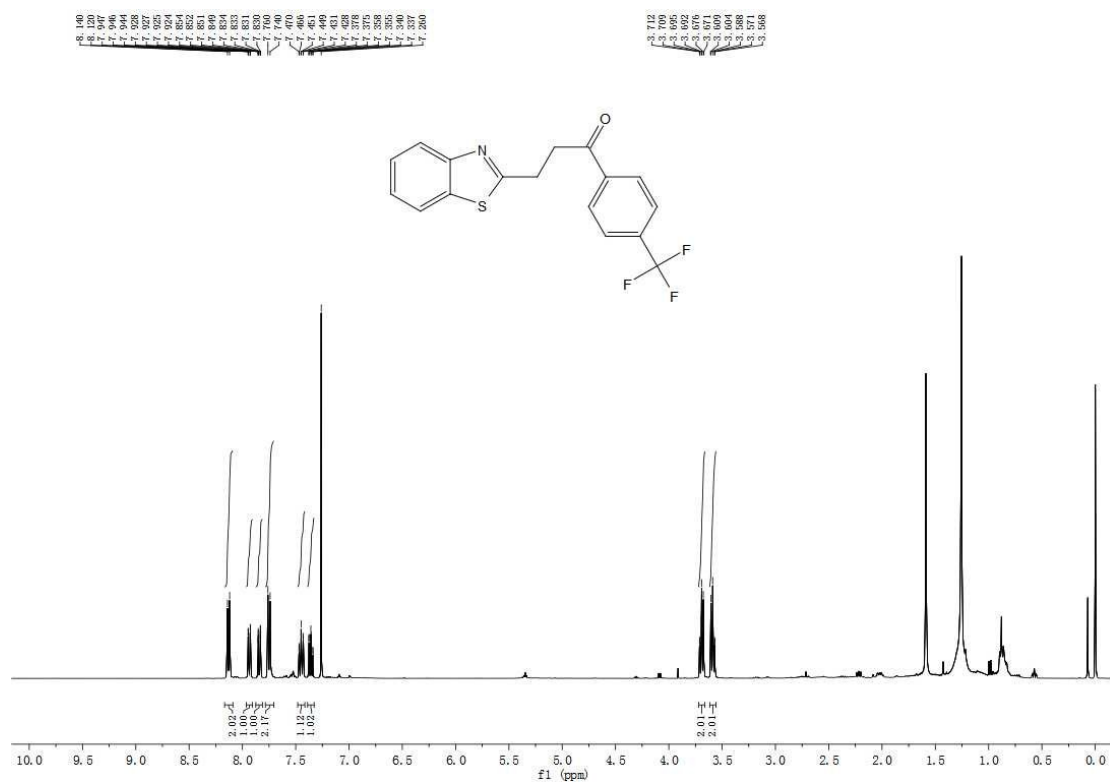

<sup>1</sup>H NMR spectrum of 3g

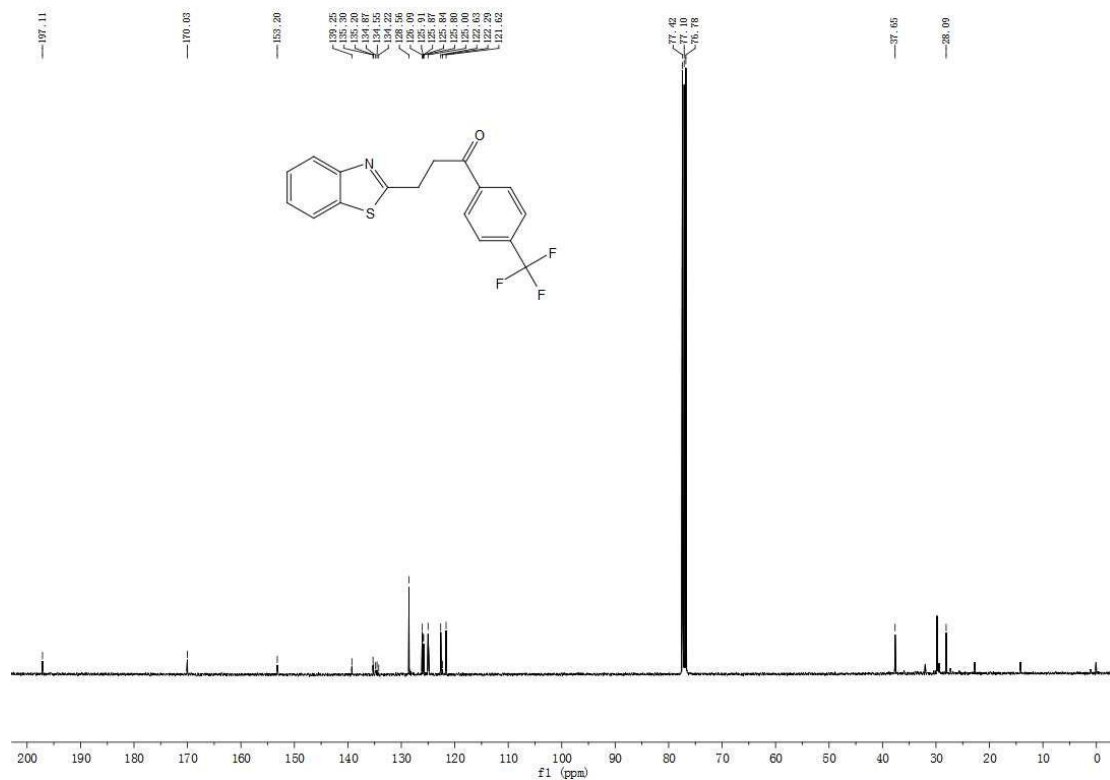

<sup>13</sup>C NMR spectrum of 3g

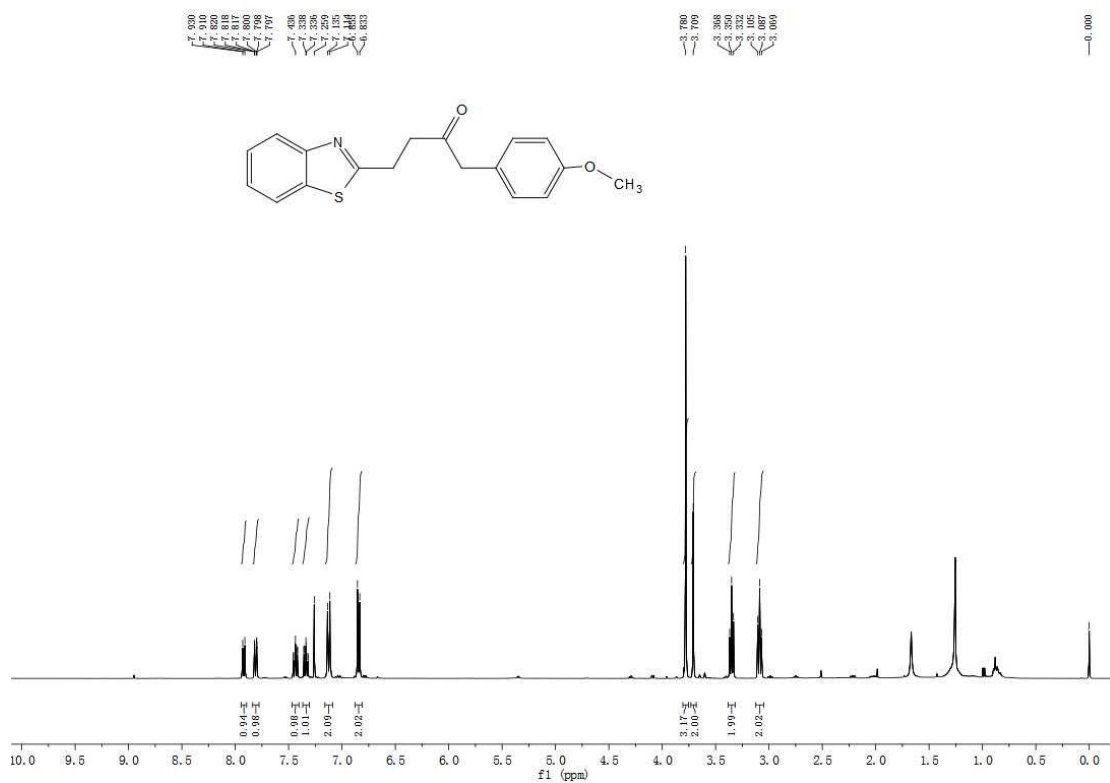

<sup>1</sup>H NMR spectrum of 3h

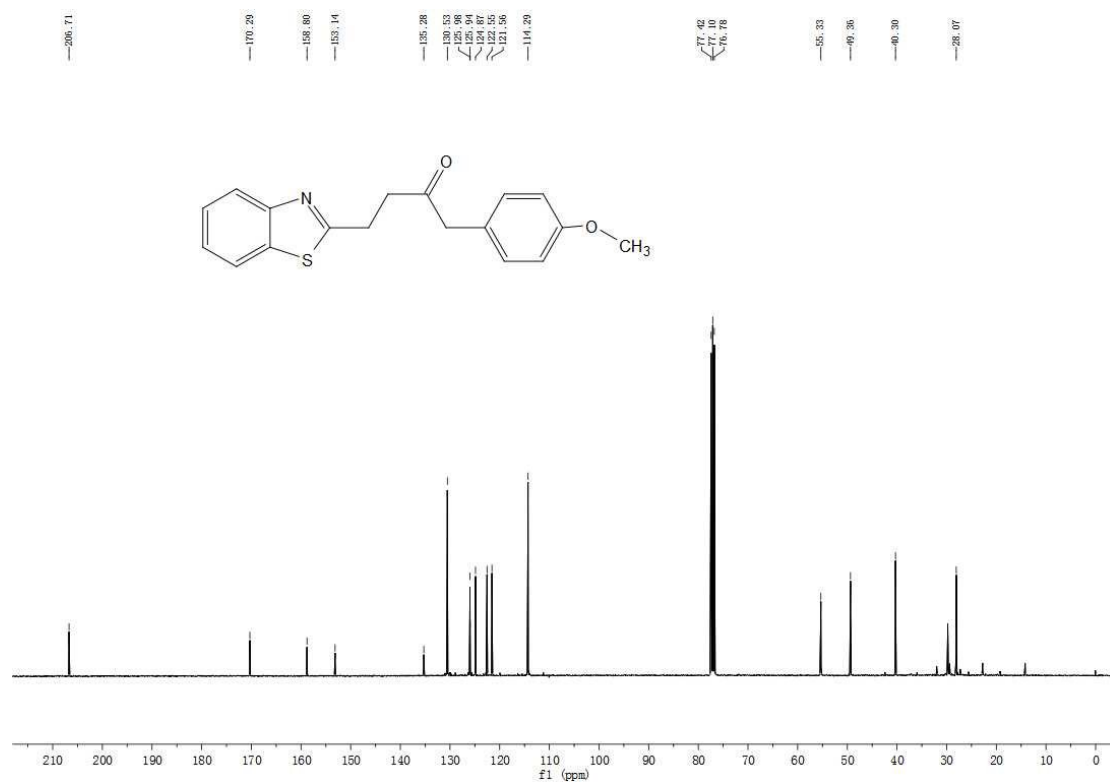

<sup>13</sup>C NMR spectrum of 3h

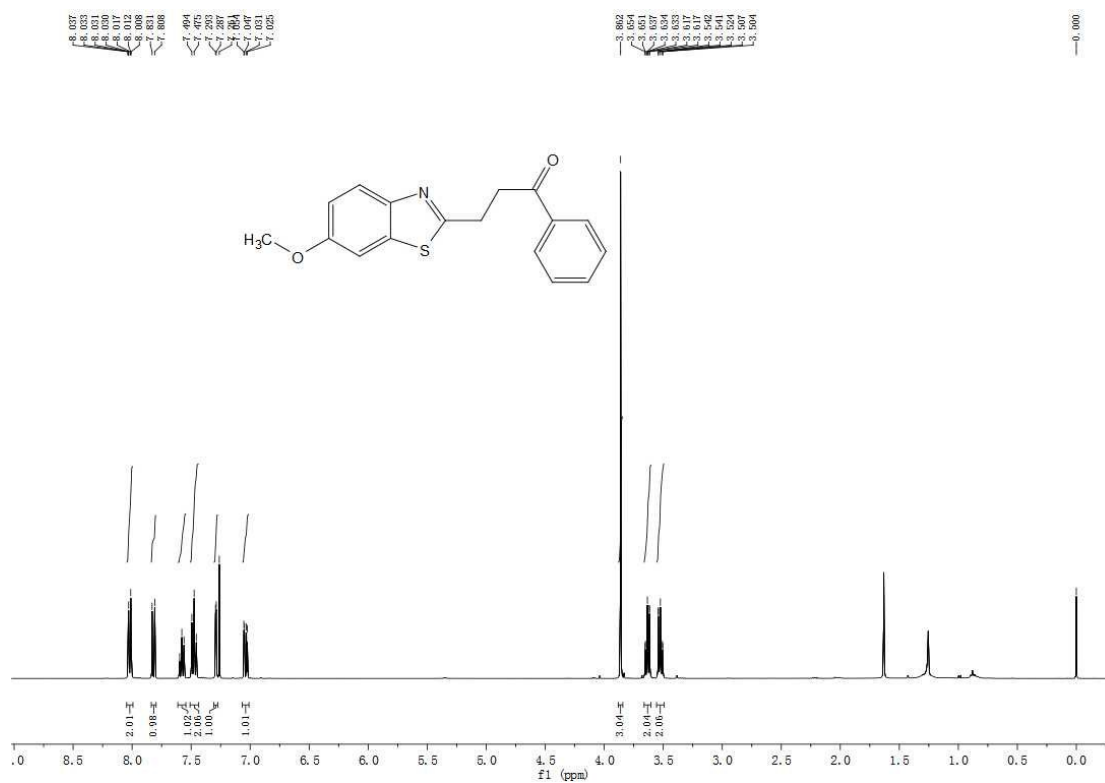

<sup>1</sup>H NMR spectrum of 3i

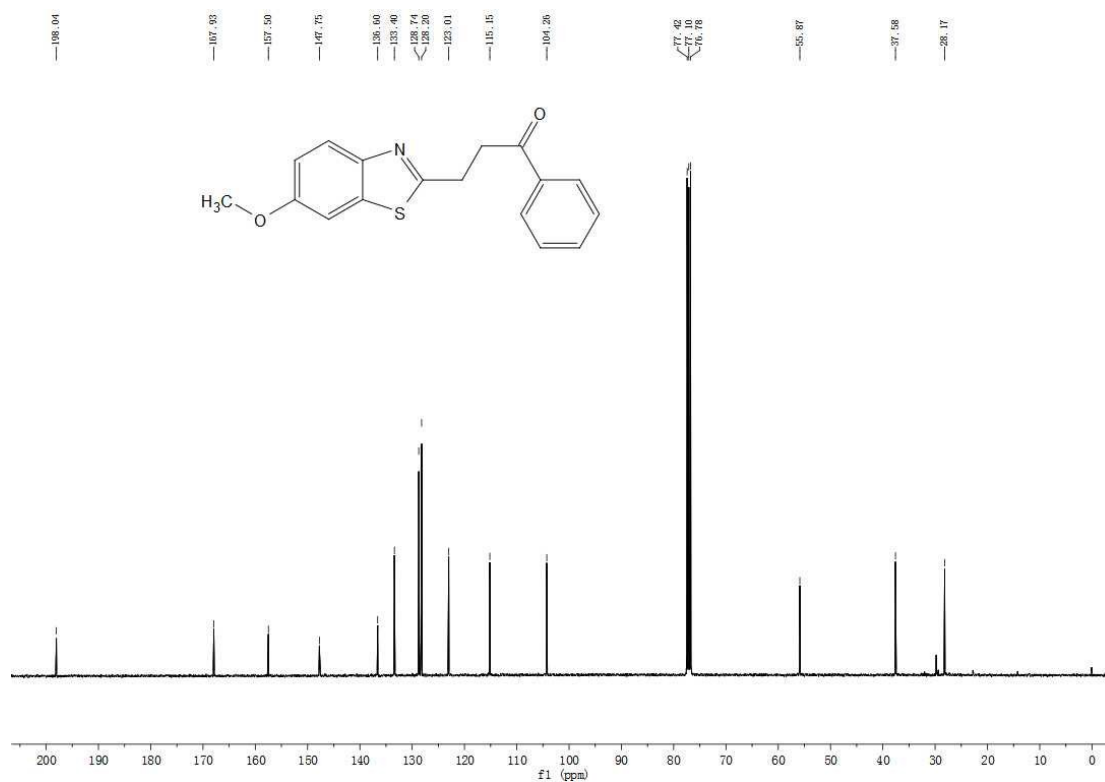

<sup>13</sup>C NMR spectrum of 3i

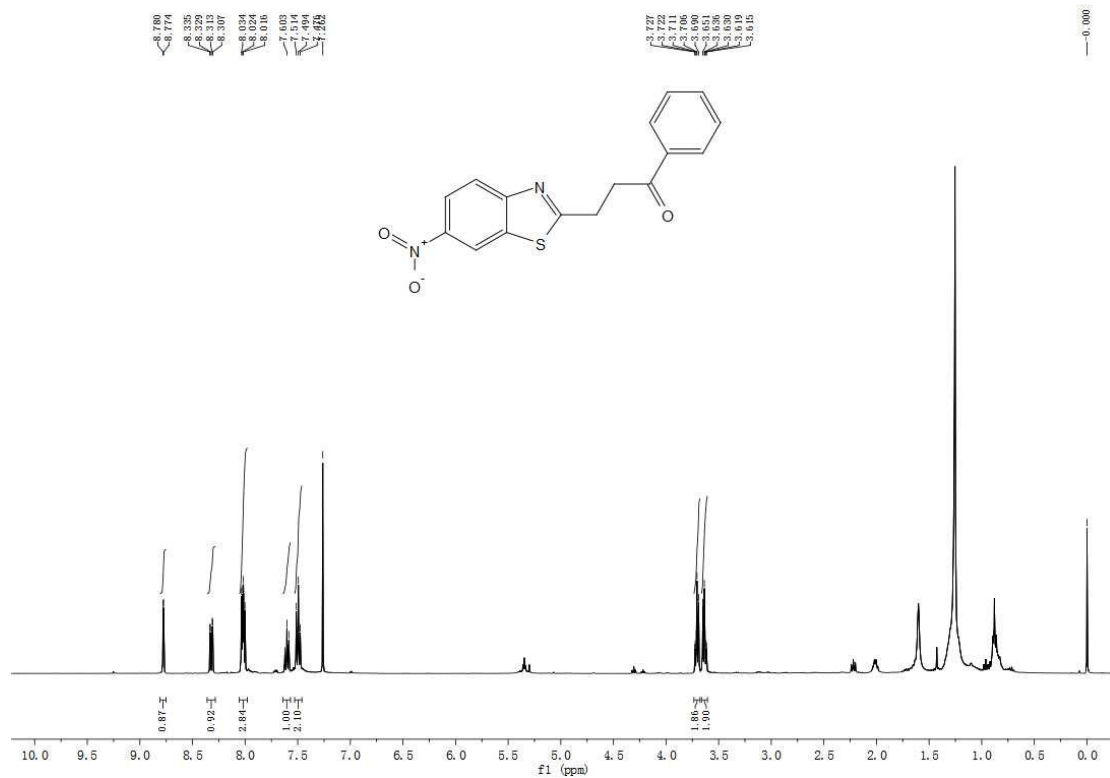

**<sup>1</sup>H NMR spectrum of 3j**

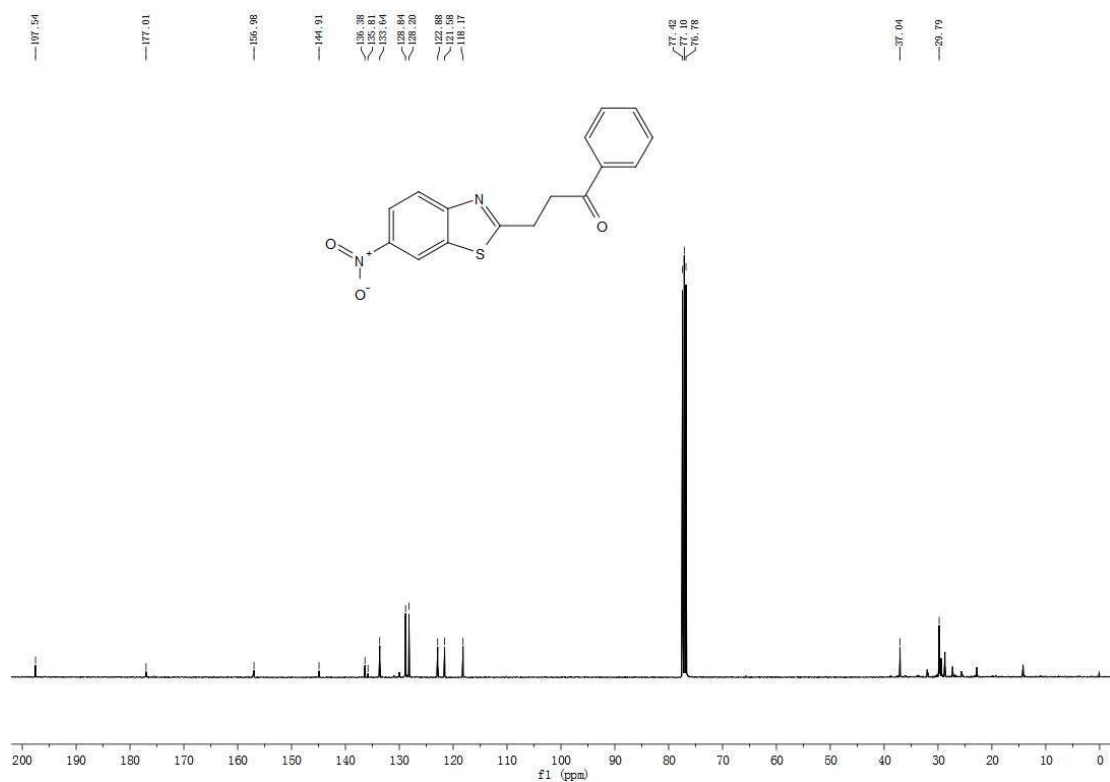

**<sup>13</sup>C NMR spectrum of 3j**

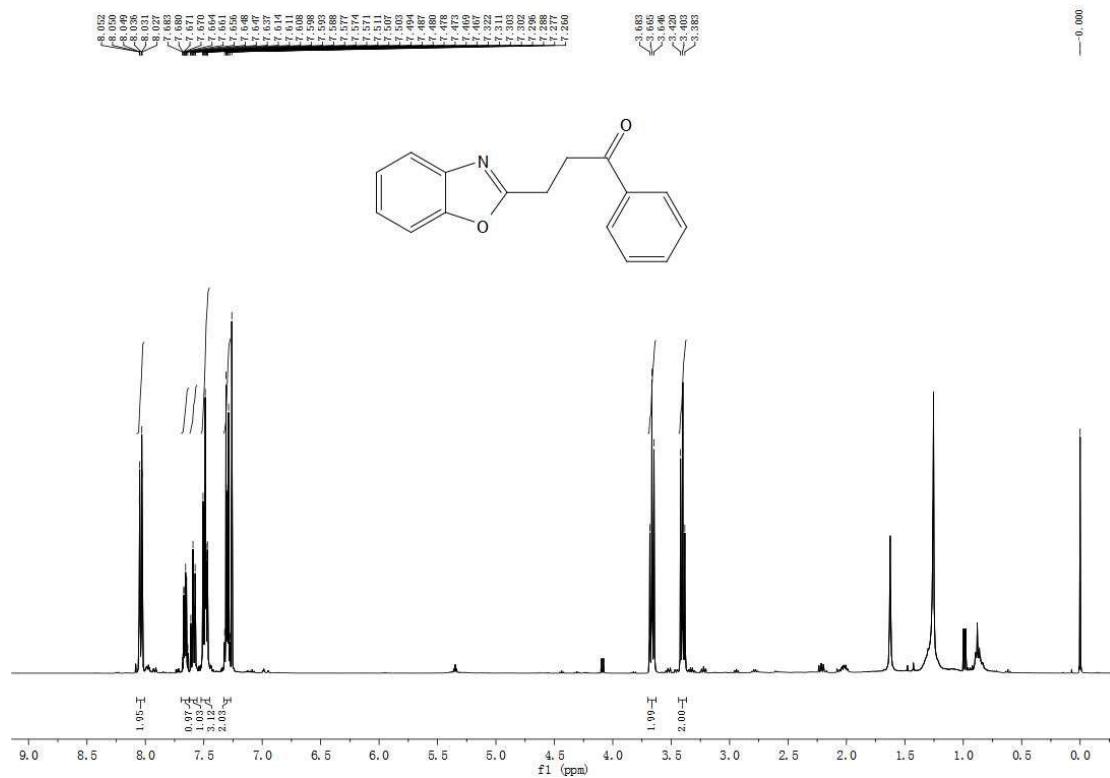

**<sup>1</sup>H NMR spectrum of 3k**

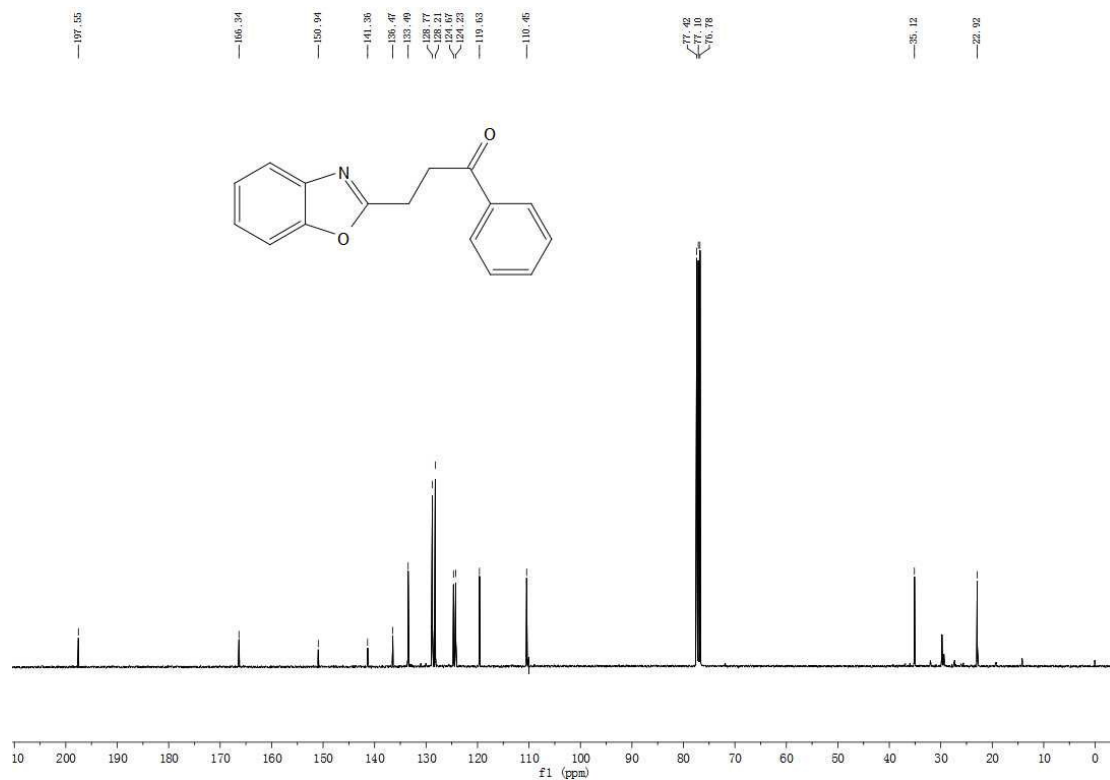

**<sup>13</sup>C NMR spectrum of 3k**



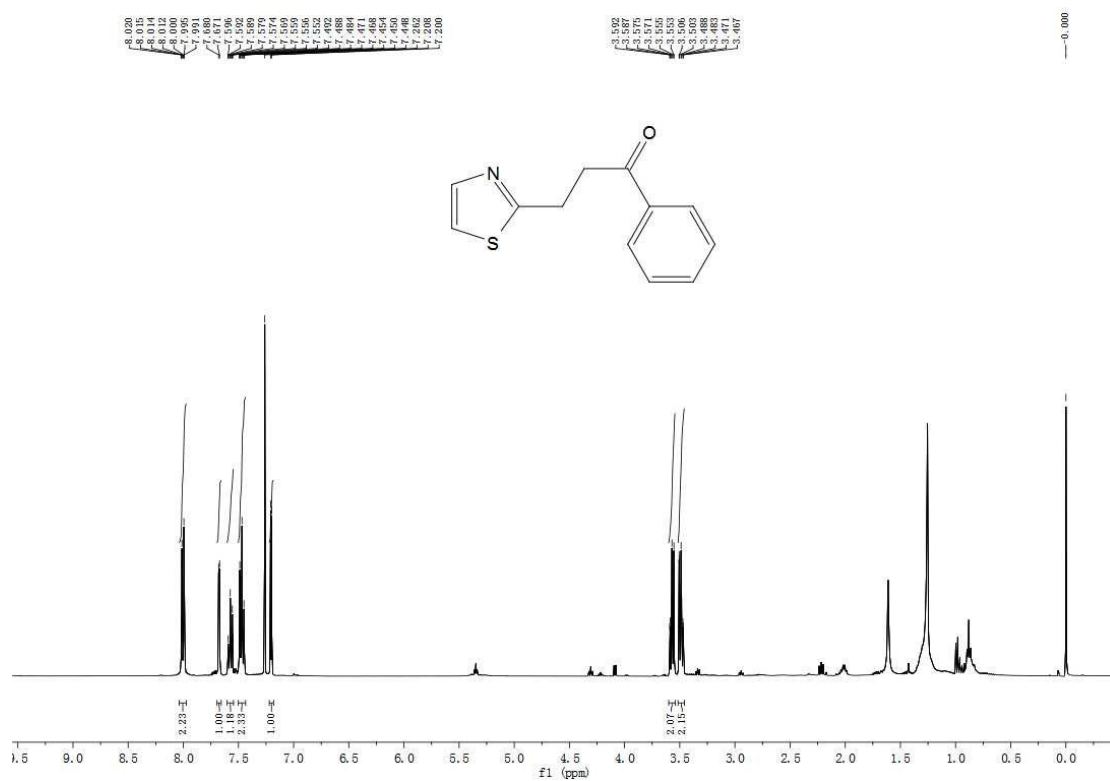

<sup>1</sup>H NMR spectrum of 3l

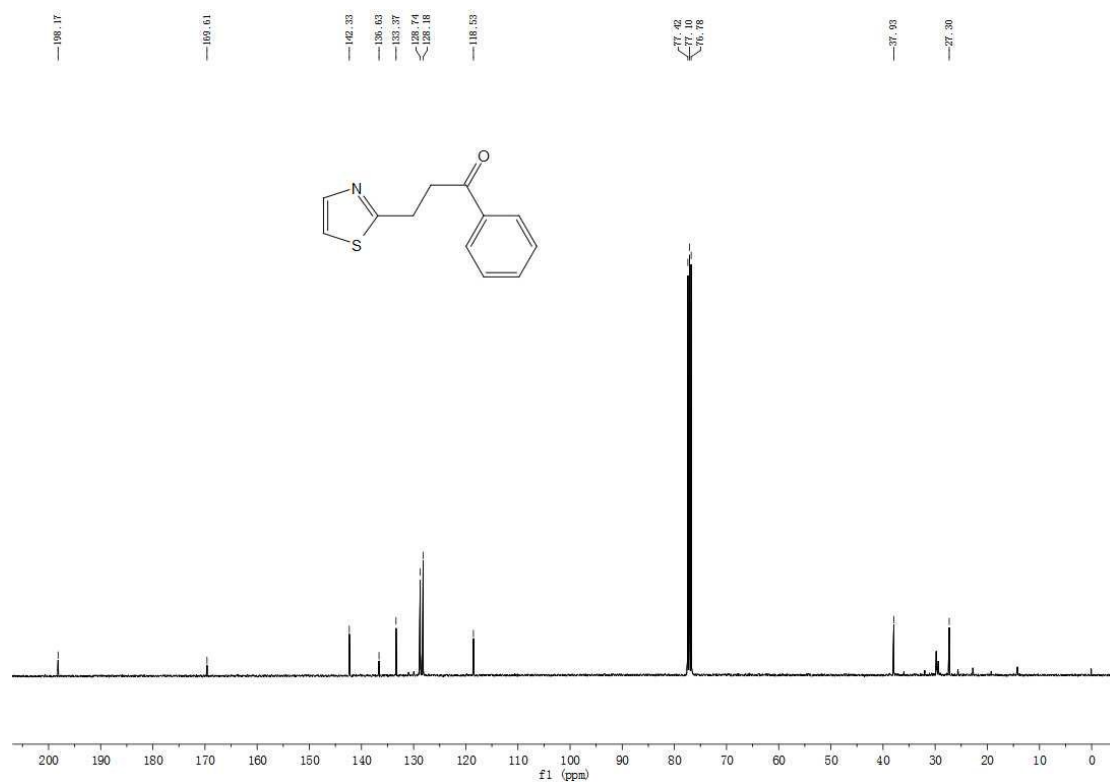

<sup>13</sup>C NMR spectrum of 3l

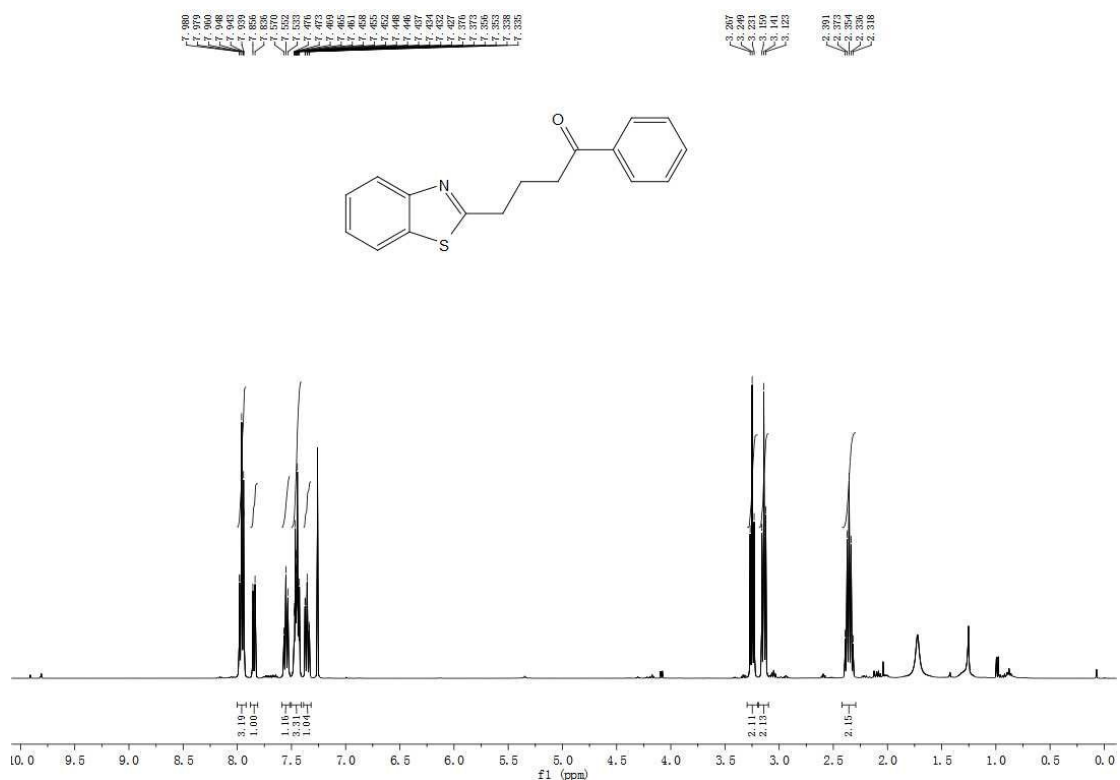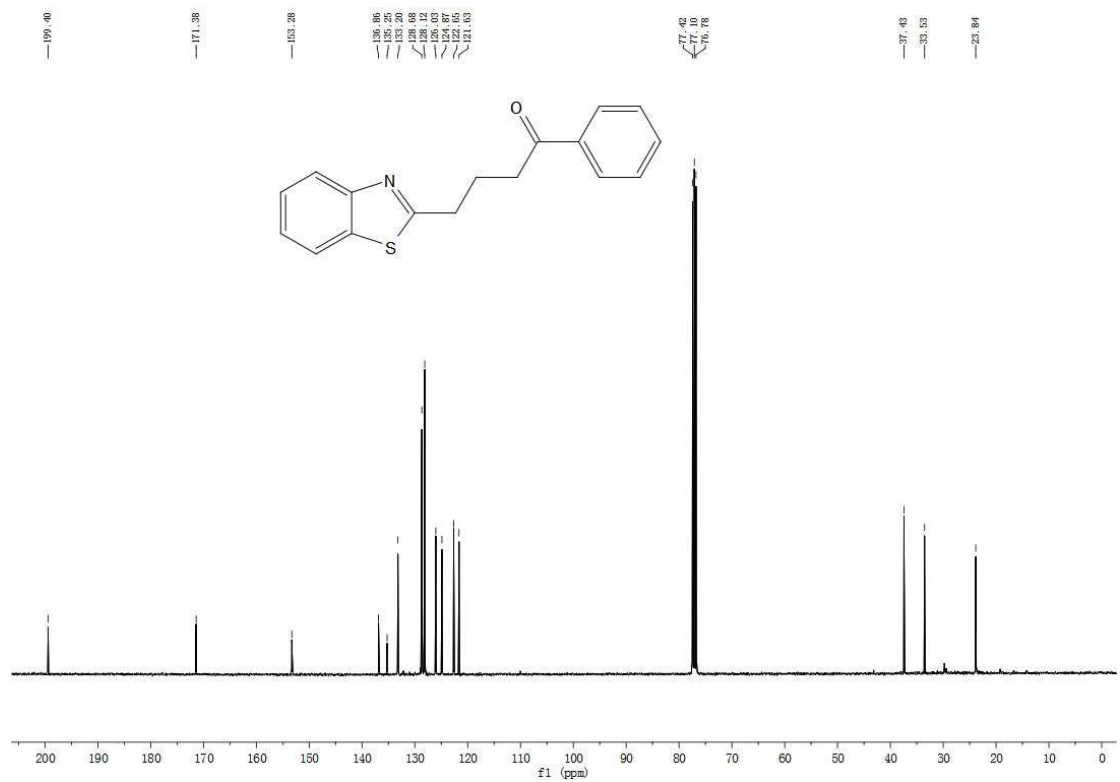

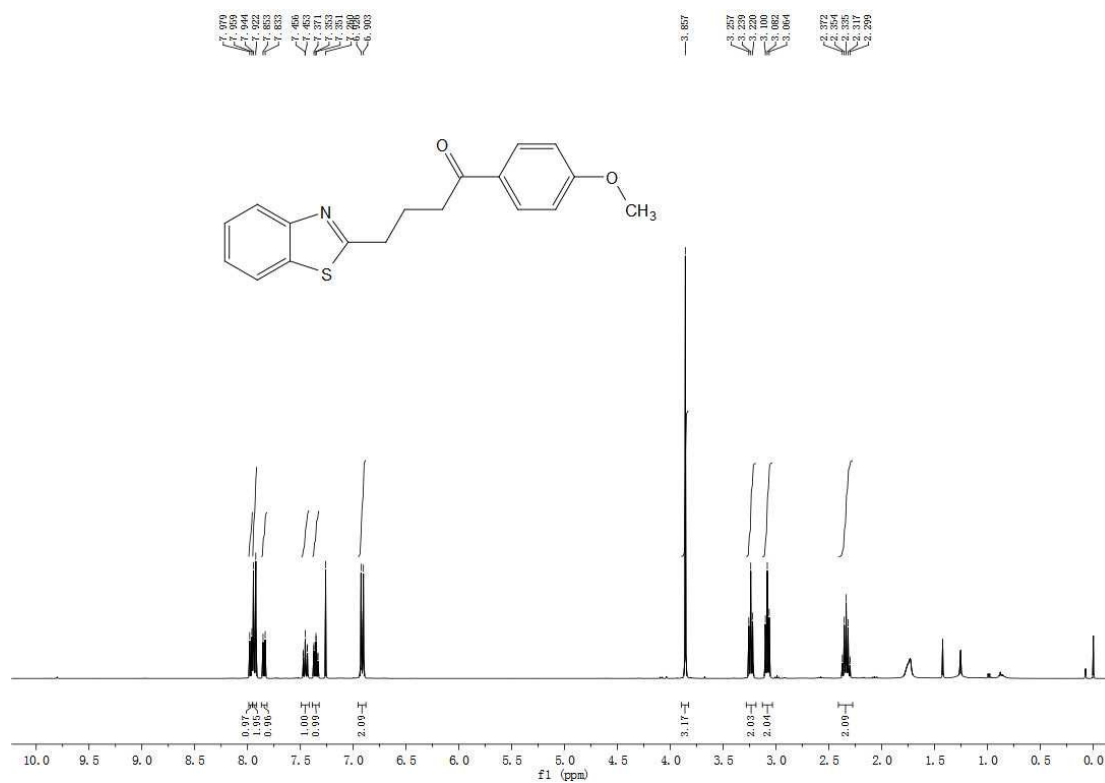

**<sup>1</sup>H NMR spectrum of 3n**

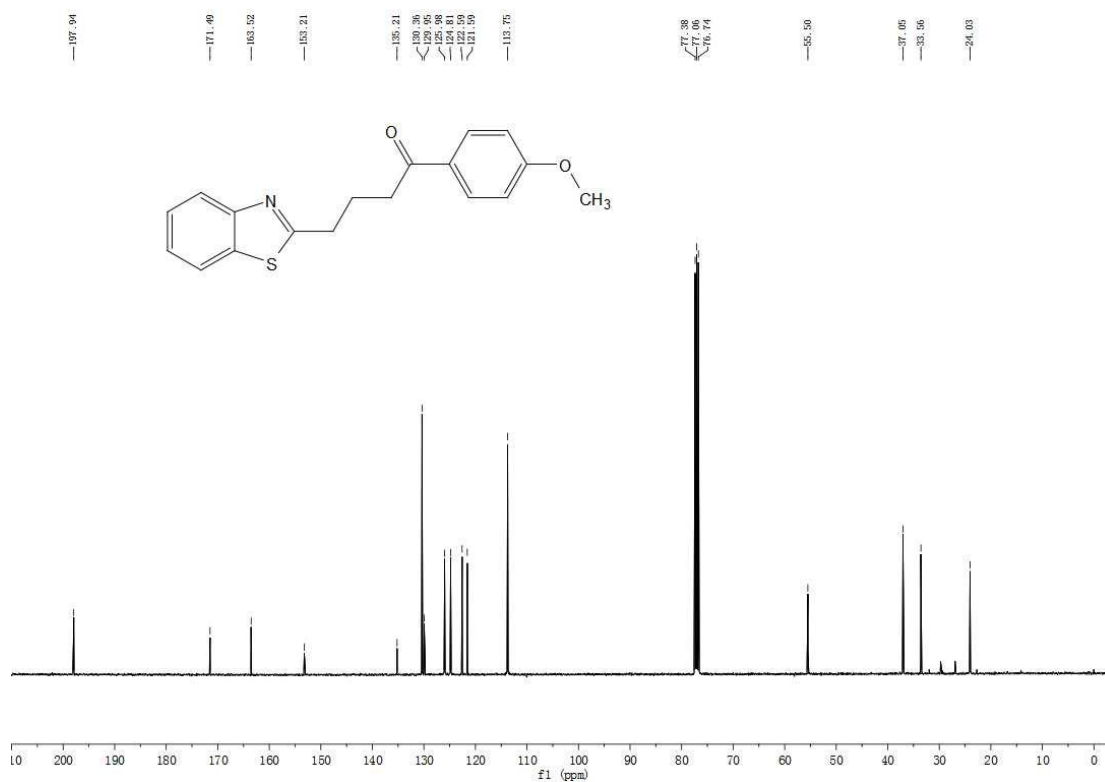

**<sup>13</sup>C NMR spectrum of 3n**

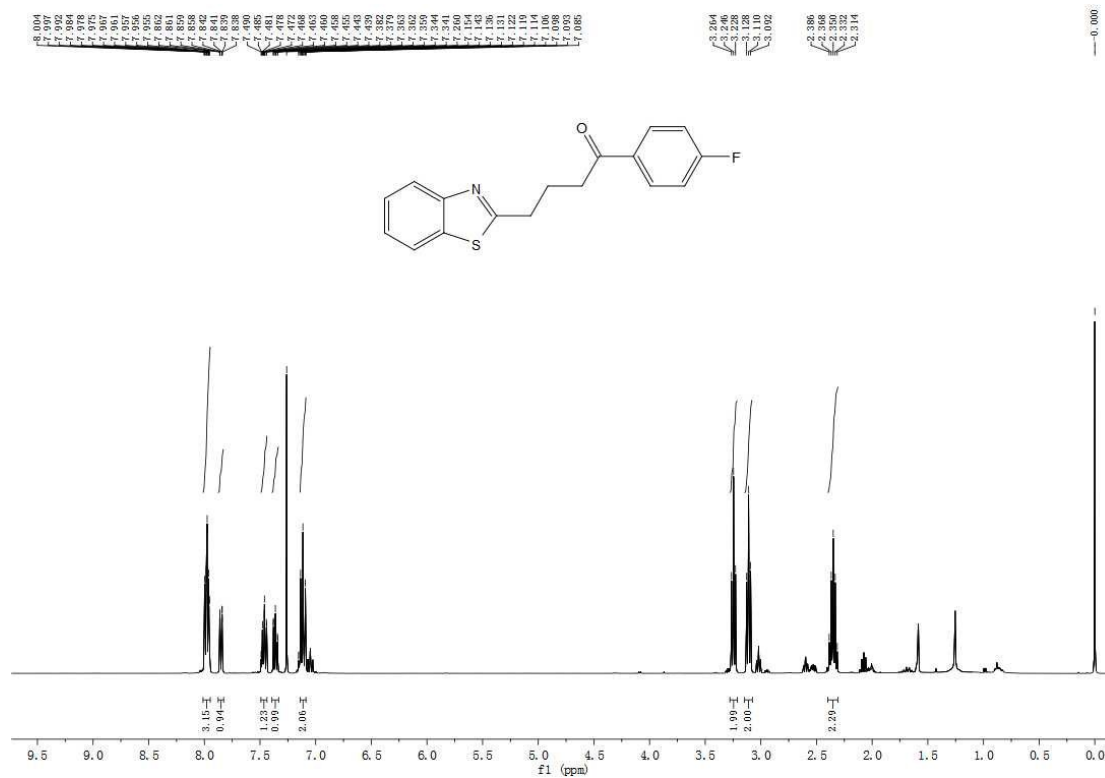

<sup>1</sup>H NMR spectrum of 3o

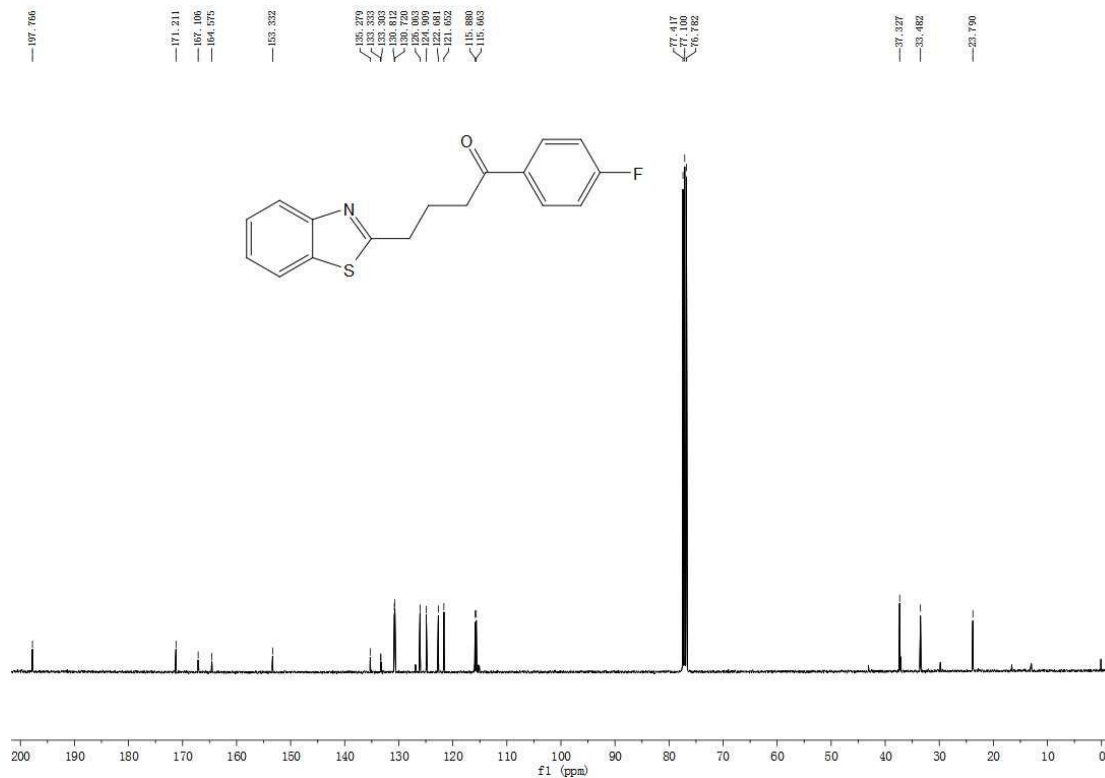

<sup>13</sup>C NMR spectrum of 3o

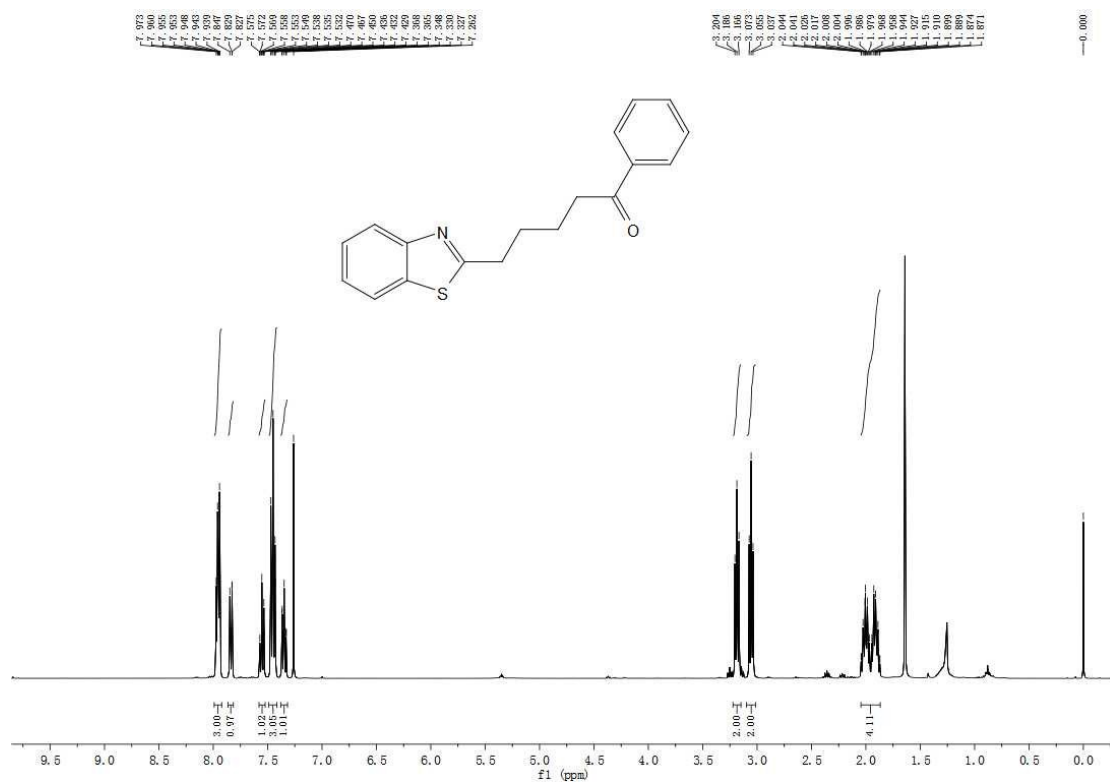

<sup>1</sup>H NMR spectrum of 3p

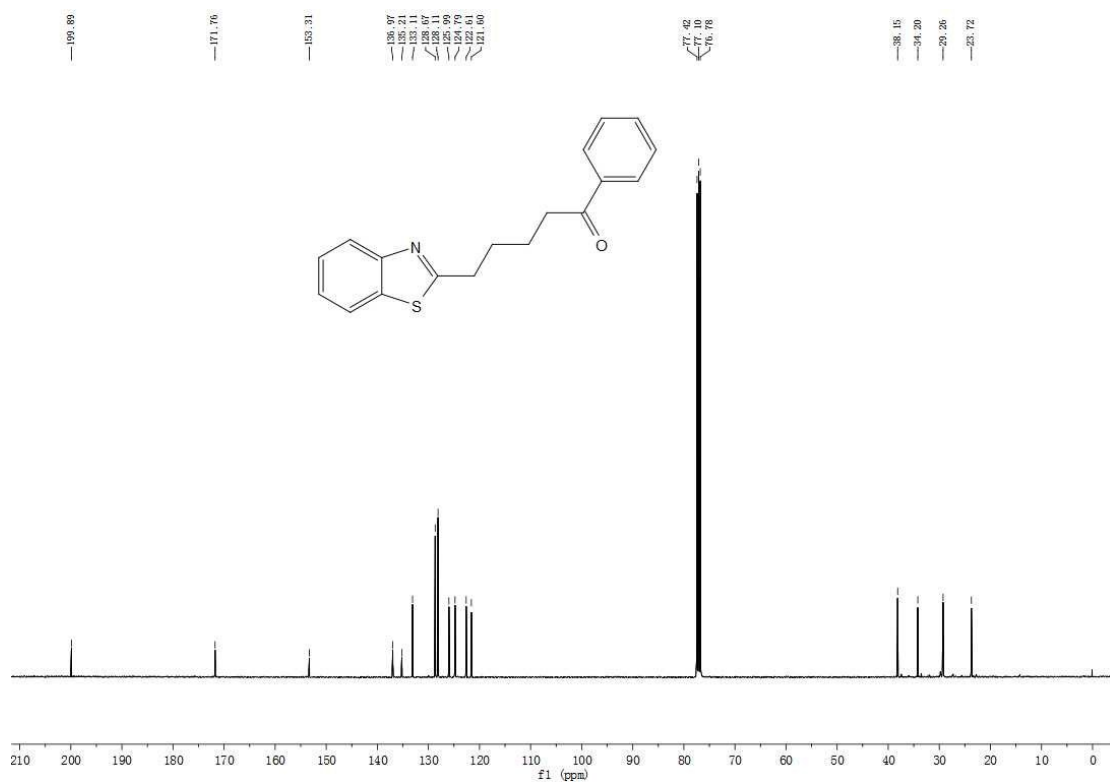

<sup>13</sup>C NMR spectrum of 3p

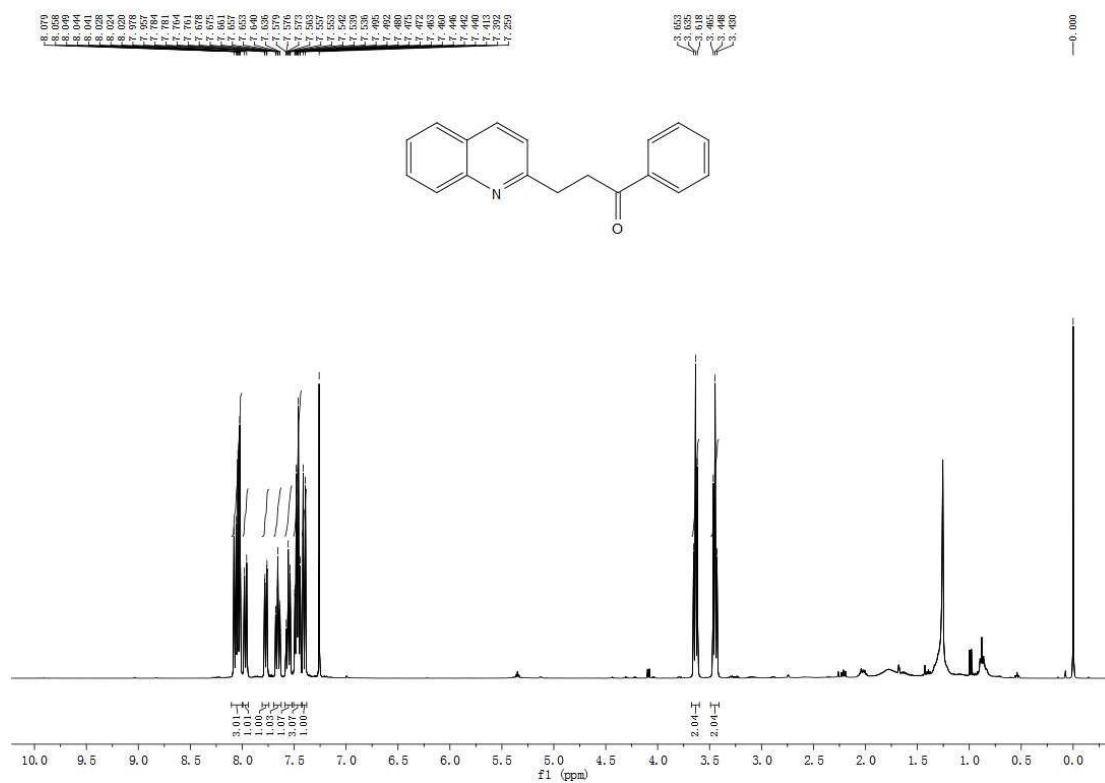

**<sup>1</sup>H NMR spectrum of 5a**

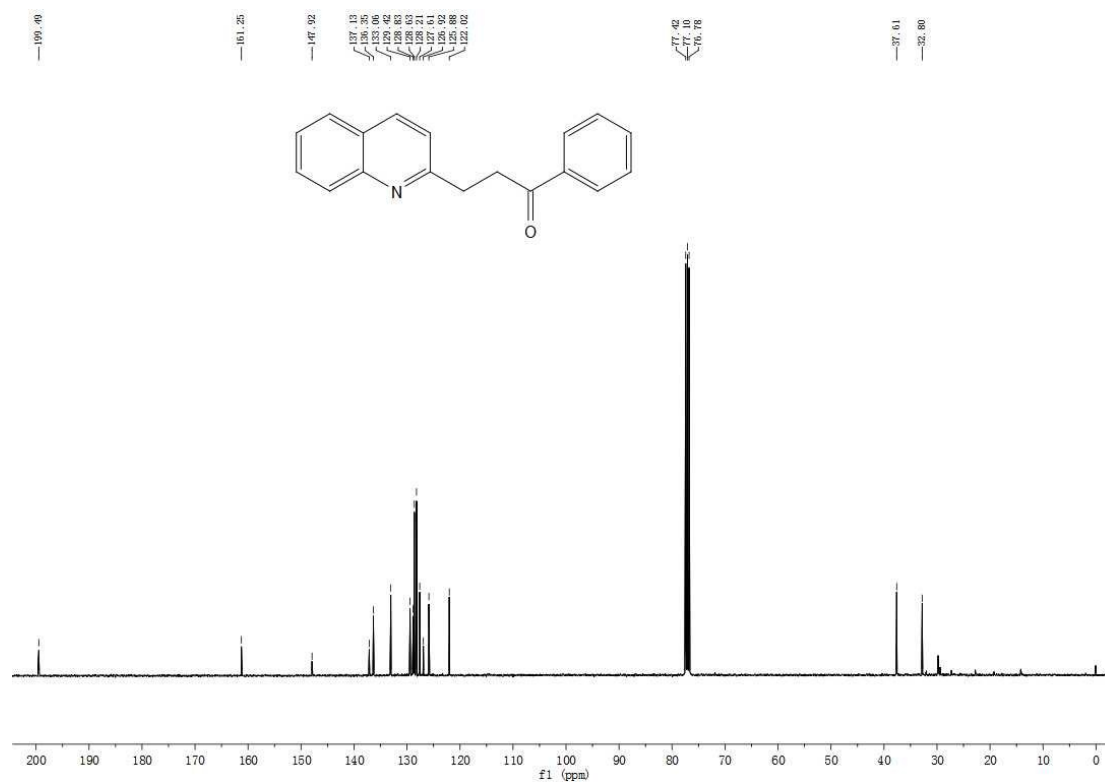

**<sup>13</sup>C NMR spectrum of 5a**

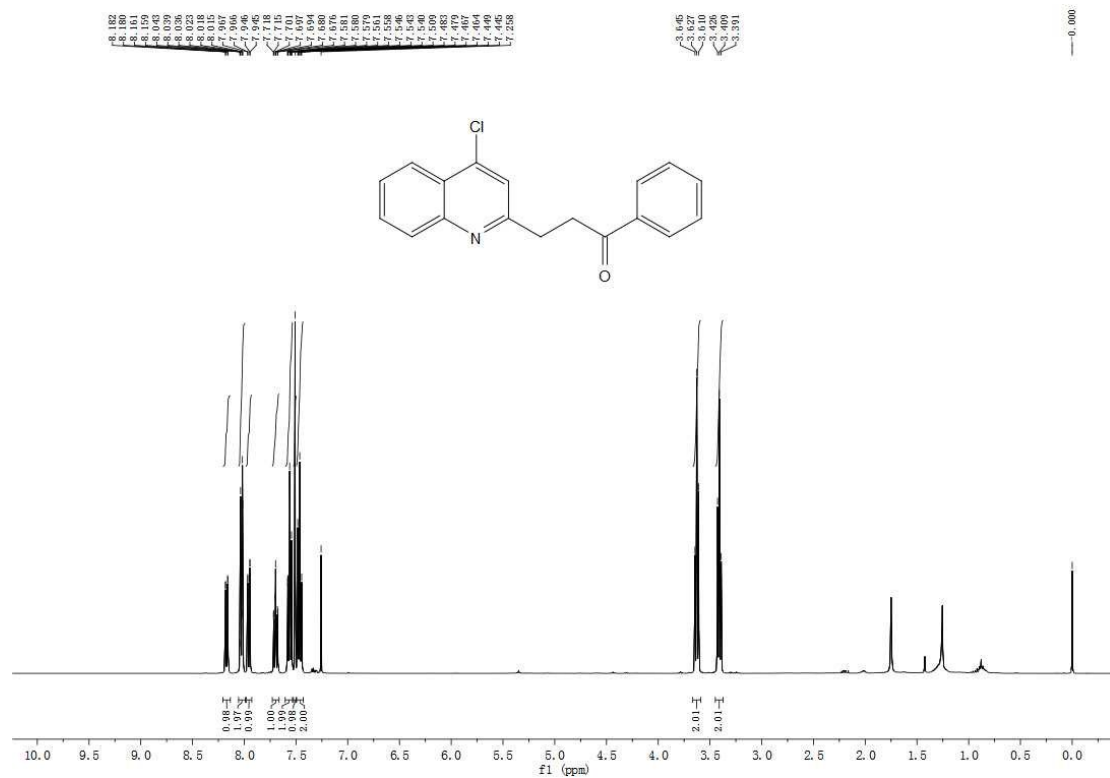

<sup>1</sup>H NMR spectrum of 5b

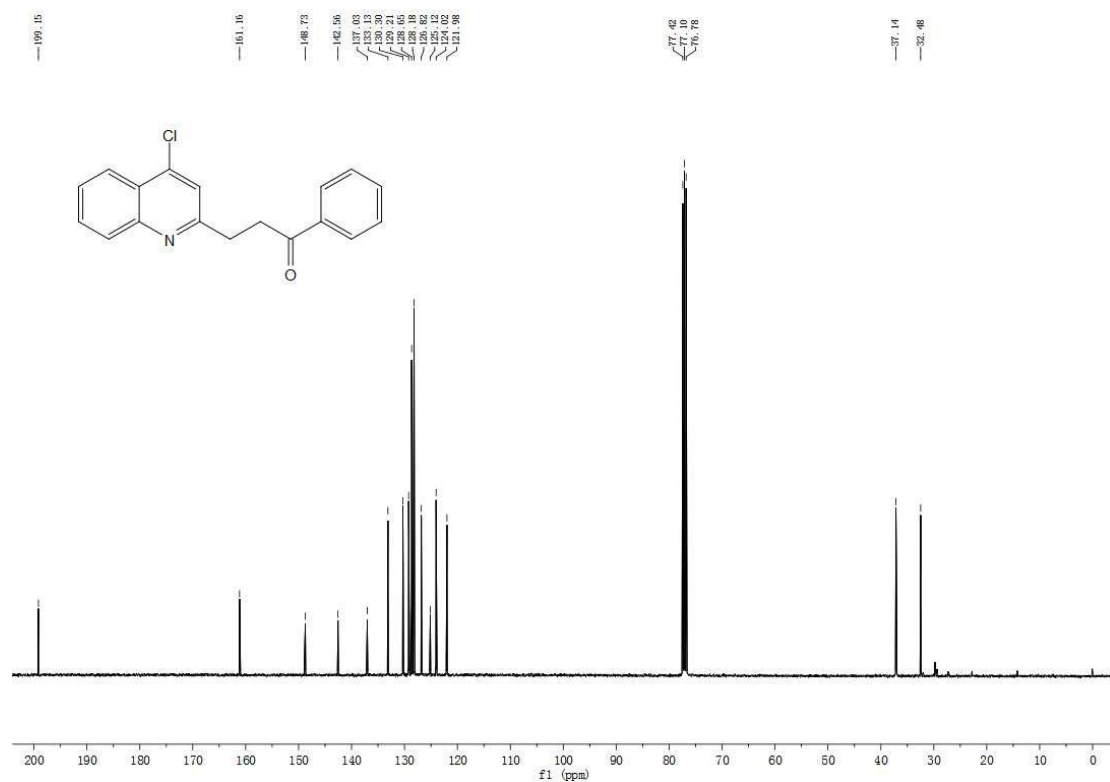

<sup>13</sup>C NMR spectrum of 5b

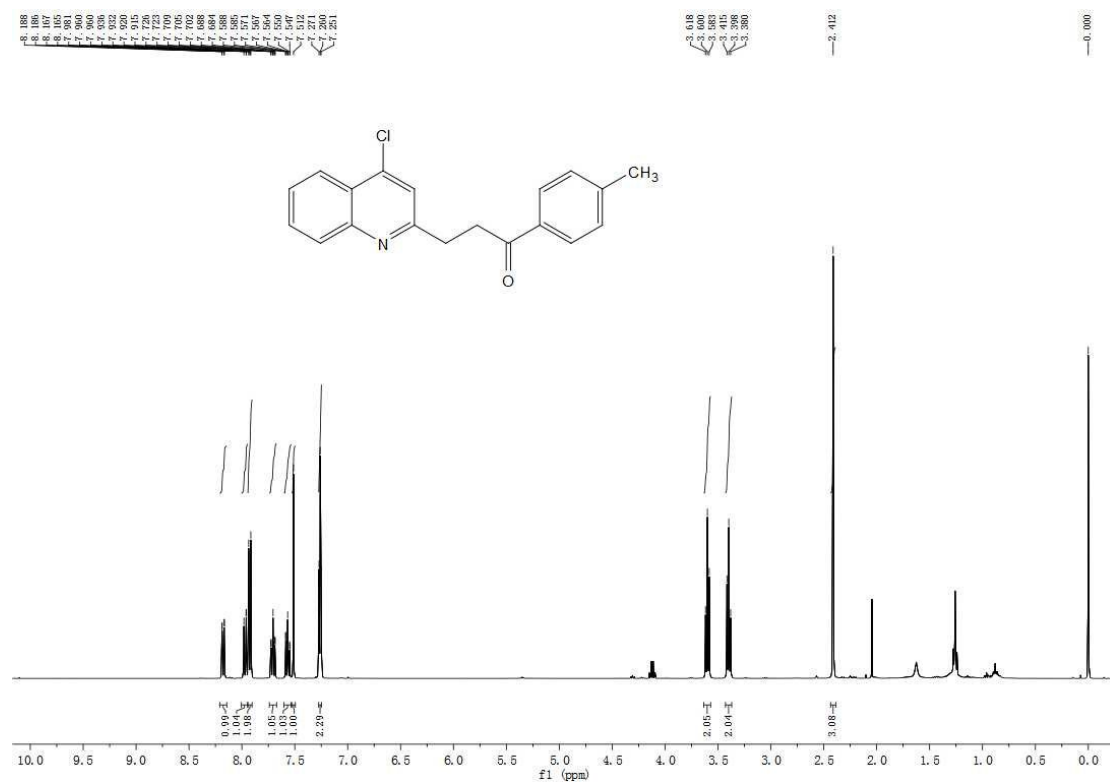

<sup>1</sup>H NMR spectrum of 5c

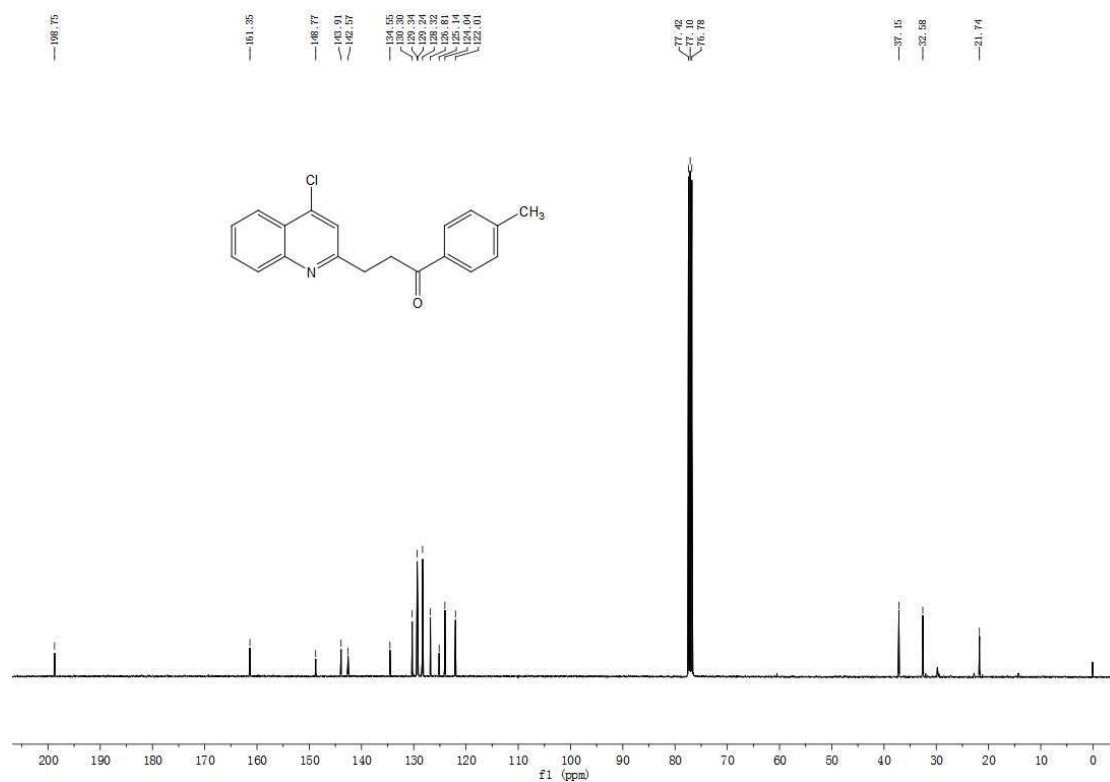

<sup>13</sup>C NMR spectrum of 5c



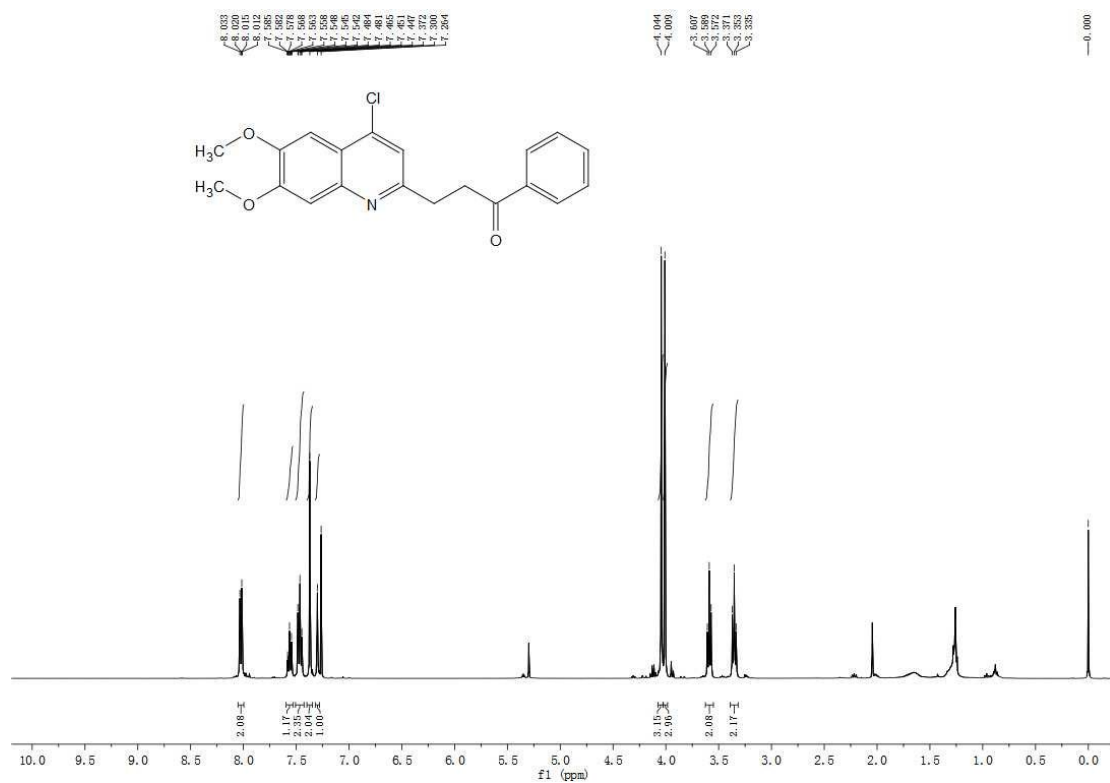

<sup>1</sup>H NMR spectrum of 5d

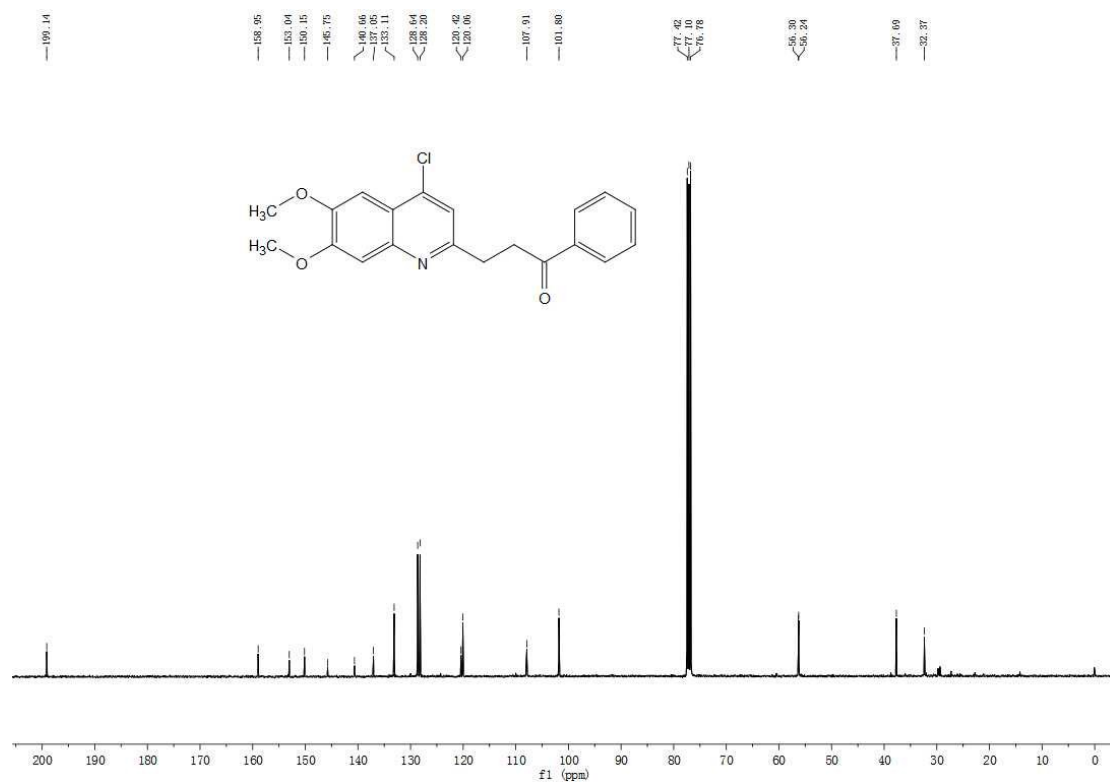

<sup>13</sup>C NMR spectrum of 5d

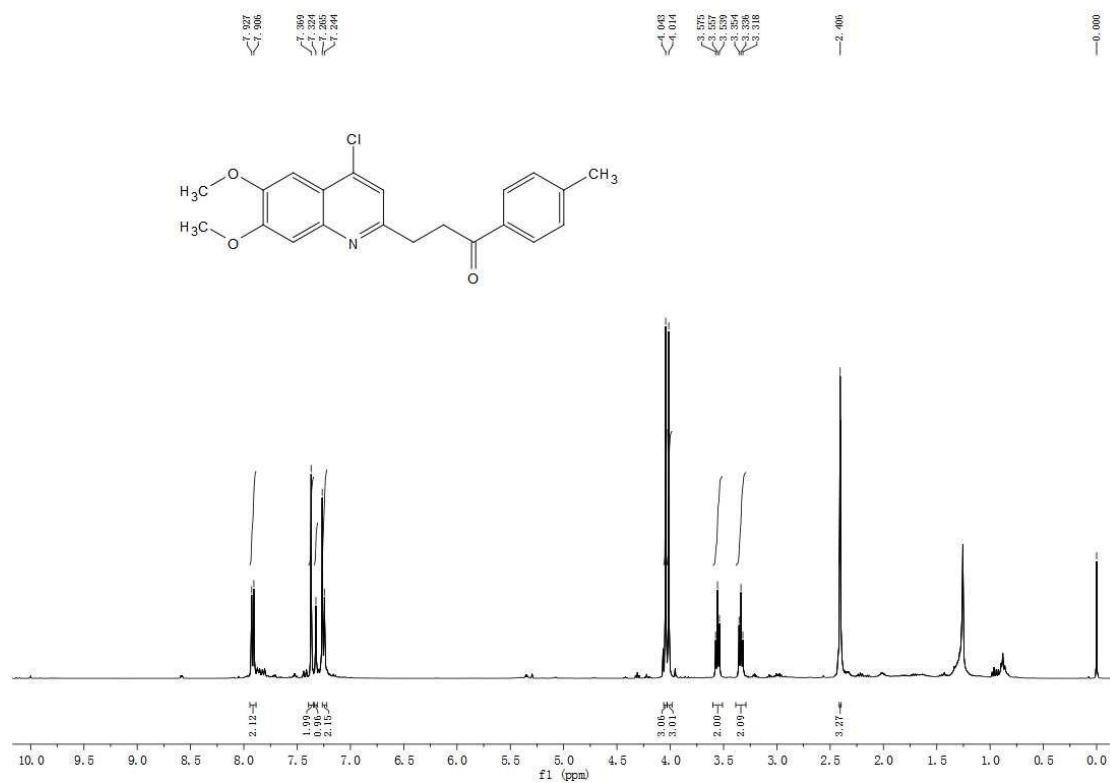

**<sup>1</sup>H NMR spectrum of 5e**

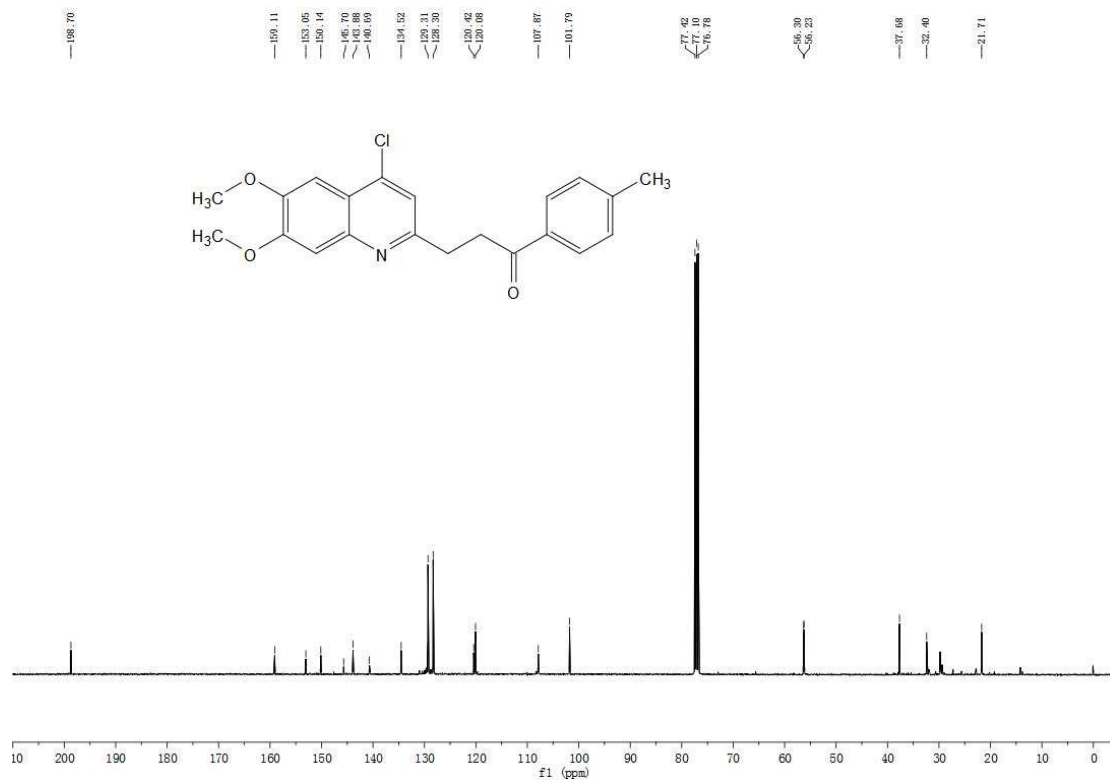

**<sup>13</sup>C NMR spectrum of 5e**

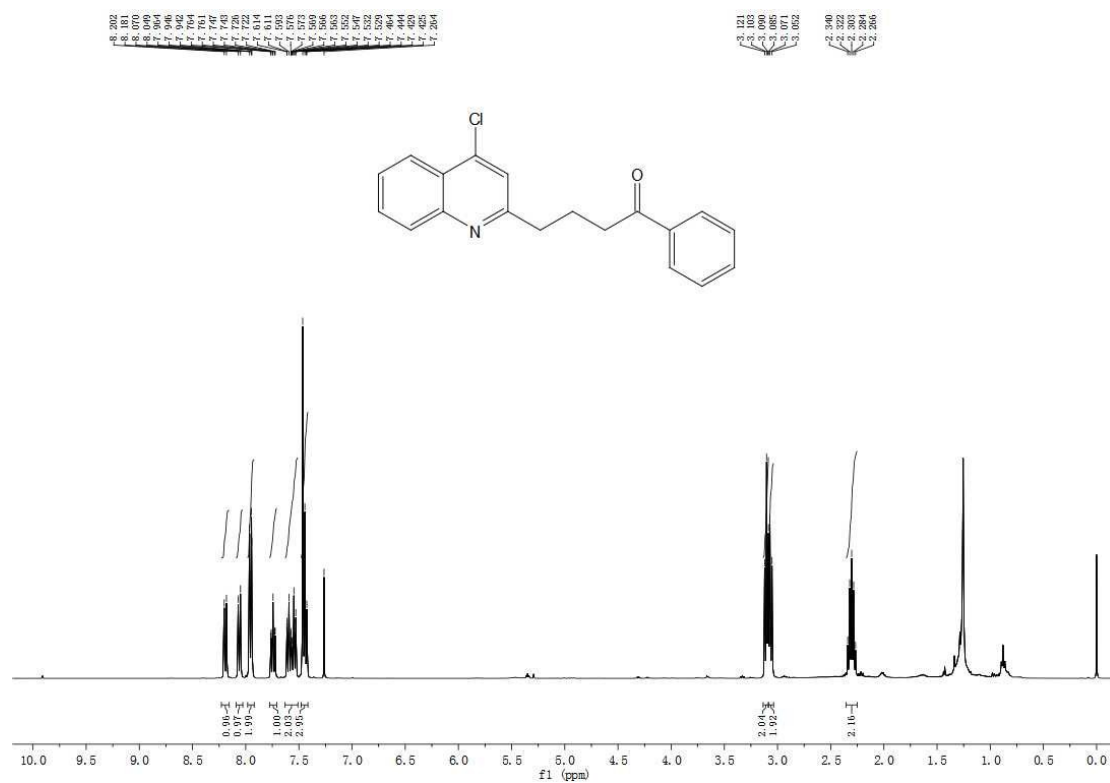

<sup>1</sup>H NMR spectrum of 5f

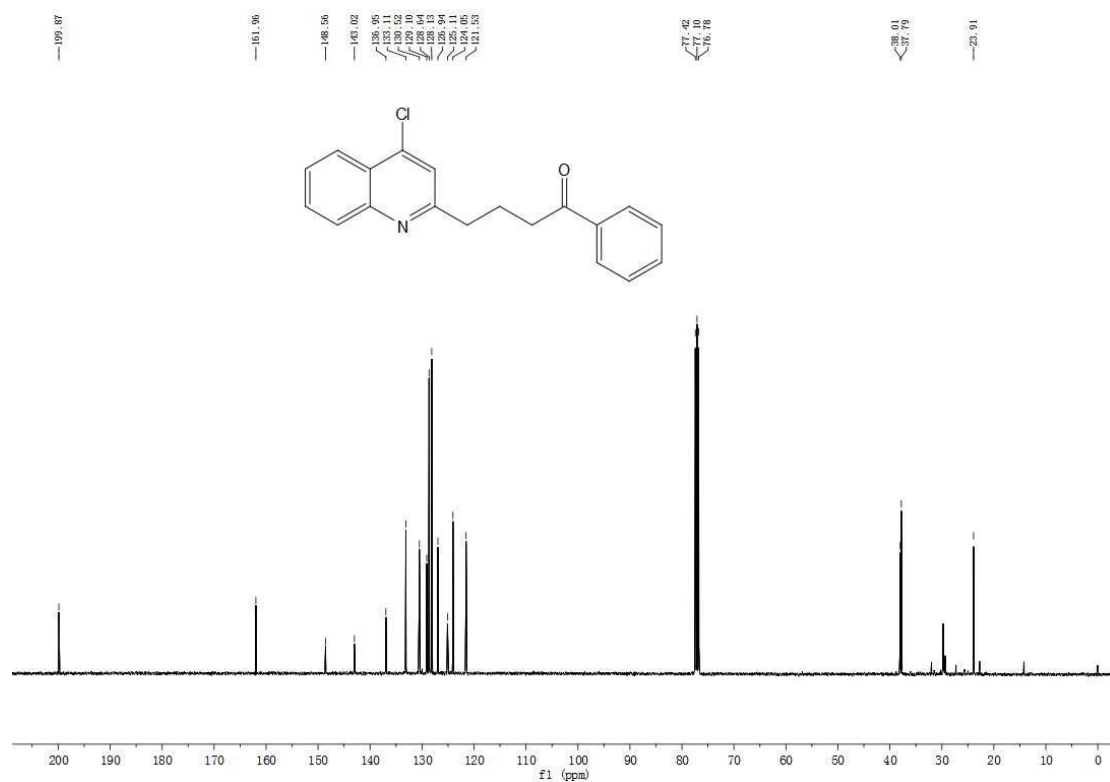

<sup>13</sup>C NMR spectrum of 5f

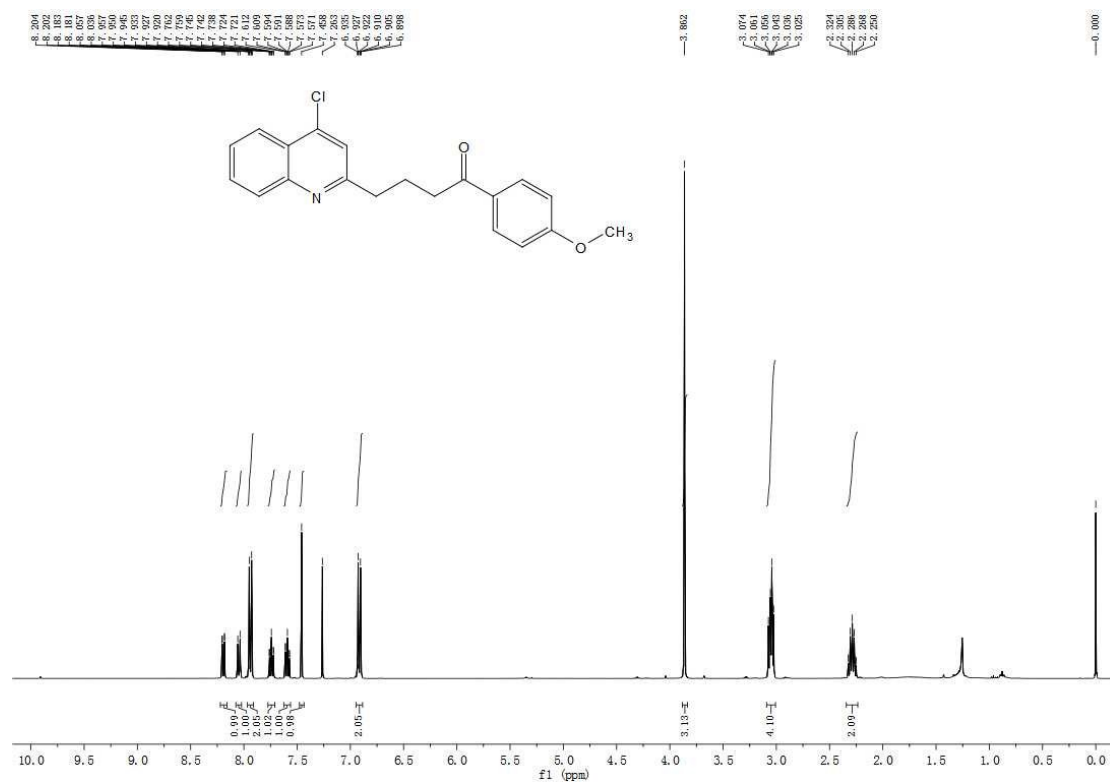

<sup>1</sup>H NMR spectrum of 5g

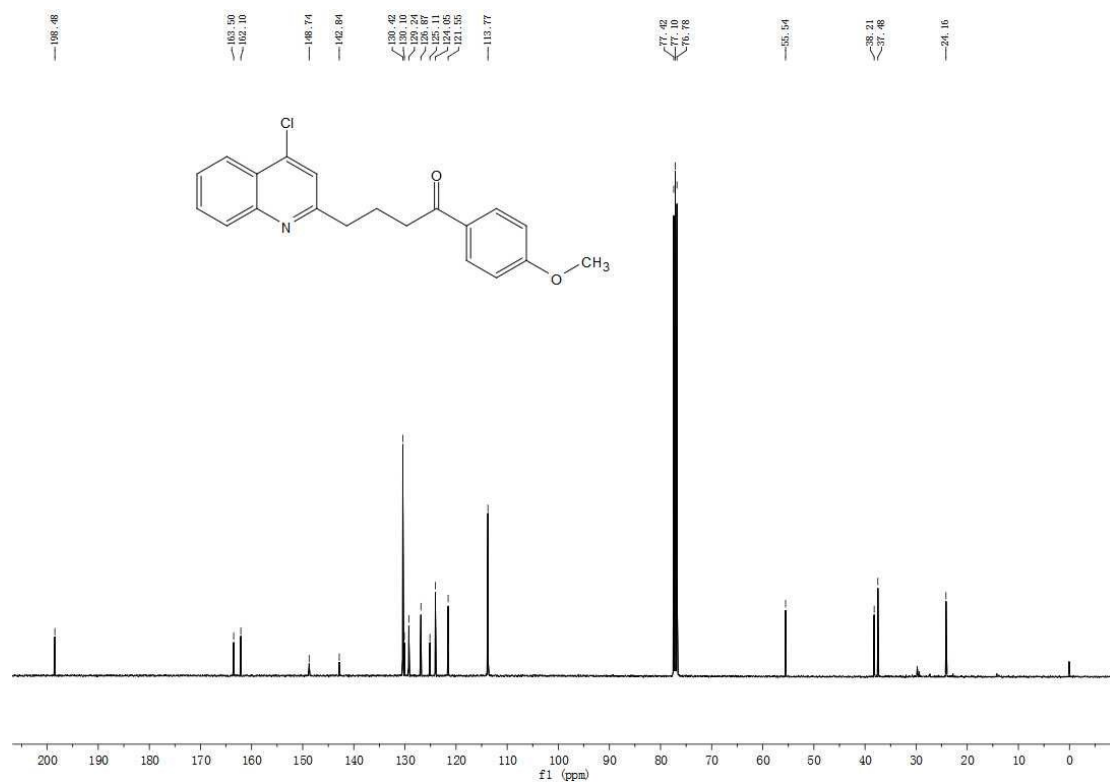

<sup>13</sup>C NMR spectrum of 5g
